# Supplementary material for: Enhancement of Tumor Cell Immunogenicity and Antitumor Properties Derived from Platinum-Conjugated Iron Nanoparticles
Source: MDPI journal article supplement (doi:10.3390/cancers15123204), 2023-06-15
Supplement: s1 [file s1]

# Enhancement of tumor cell immunogenicity and antitumoral properties of a novel platinum derivative conjugated to iron nanoparticles.

Ángela-Patricia Hernández<sup>a,b</sup>, Laura Iglesias-Anciones<sup>a</sup>, José Javier Vaquero-González<sup>a</sup>, Rafael Piñol<sup>c</sup>, Julio J. Criado<sup>d</sup>, Emilio Rodríguez<sup>d</sup>, Marina L. García-Vaquero<sup>a</sup>, Pablo Juanes-Velasco<sup>a</sup>, Carlota Arias-Hidalgo<sup>a</sup>, Alberto Orfao<sup>a</sup>, Angel Millán<sup>c\*</sup> and Manuel Fuentes<sup>a,e\*</sup>

---

<sup>a</sup>Department of Medicine and General Cytometry Service-Nucleus, CIBERONC CB16/12/00400, Cancer Research Centre, (IBMCC/CSIC/USAL/IBSAL), University of Salamanca-CSIC, IBSAL, Campus Miguel de Unamuno s/n, 37007 Salamanca.

<sup>b</sup>Department of Pharmaceutical Sciences. Organic Chemistry Section. Faculty of Pharmacy, University of Salamanca, Campus Miguel de Unamuno s/n, 37007 Salamanca, Spain

<sup>c</sup>INMA, Institute of Nanoscience and Materials of Aragon, CSIC-University of Zaragoza, 50018 Saragossa, Spain

<sup>d</sup>Department of Inorganic Chemistry, Faculty of Chemical Sciences, Plaza de los Caídos S/N, 37008 Salamanca, Spain.

<sup>e</sup>Proteomics Unit, Cancer Research Centre (IBMCC/CSIC/USAL/IBSAL), 37007 Salamanca, Spain.

## Supplementary Figures

### Chemical Characterization

Figure S1

Ptgudca1

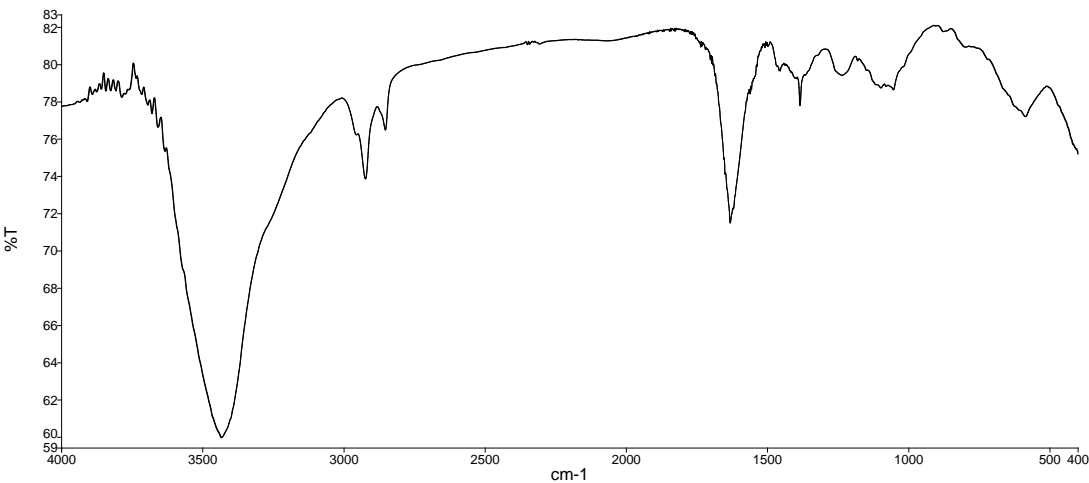

Nombre Descripción  
Ptgudca1 Sample 163 By Administrator Date Monday, July 09 2018

| Peak Number | X (cm-1) | Y (%T) |
|-------------|----------|--------|
| 1           | 3434.62  | 59.98  |
| 2           | 2924.27  | 73.88  |
| 3           | 1632.1   | 71.51  |
| 4           | 1384.47  | 77.81  |
| 5           | 1053.55  | 78.67  |
| 6           | 585.54   | 77.23  |

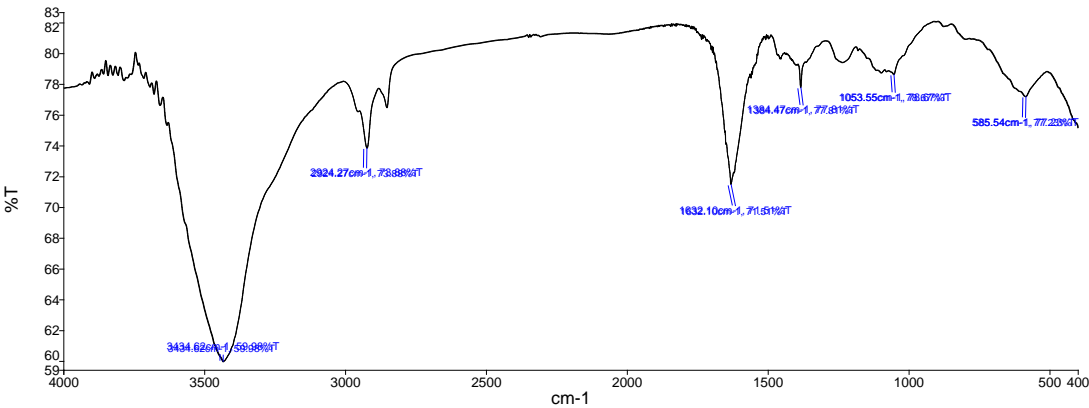

Nombre Descripción  
Ptgudca1 Sample 163 By Administrator Date Monday, July 09 2018

Figure S2

Gudca1

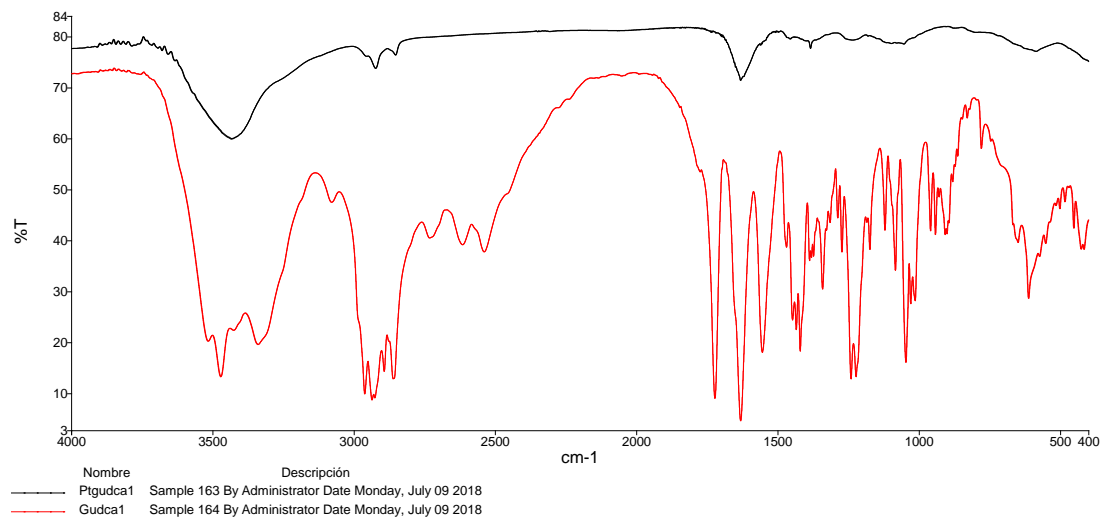

| Peak Number | X (cm-1) | Y (%T) |
|-------------|----------|--------|
| 1           | 2962.82  | 9.98   |
| 2           | 2937.06  | 8.77   |
| 3           | 2926.79  | 9.18   |
| 4           | 2861.99  | 12.94  |
| 5           | 1722.96  | 9.11   |
| 6           | 1631.83  | 4.69   |
| 7           | 1241.13  | 12.9   |

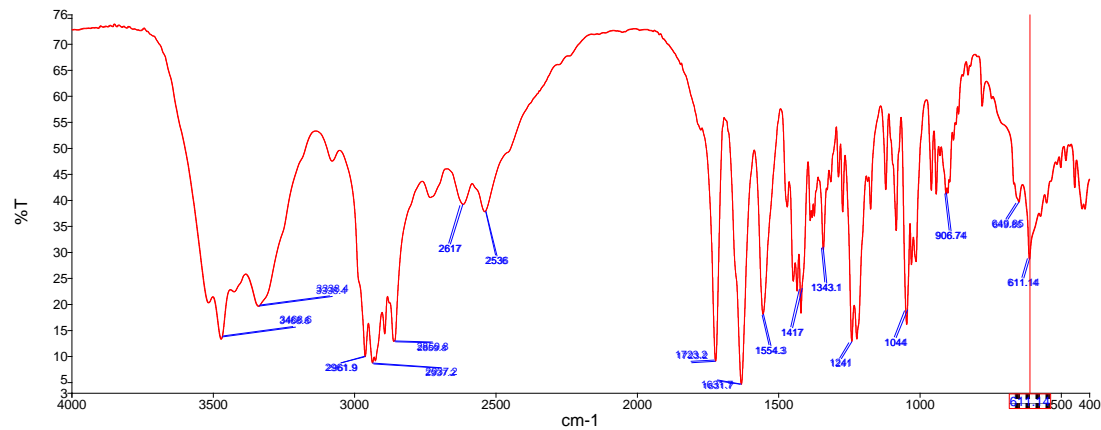

Figure S3

Ptgudca2

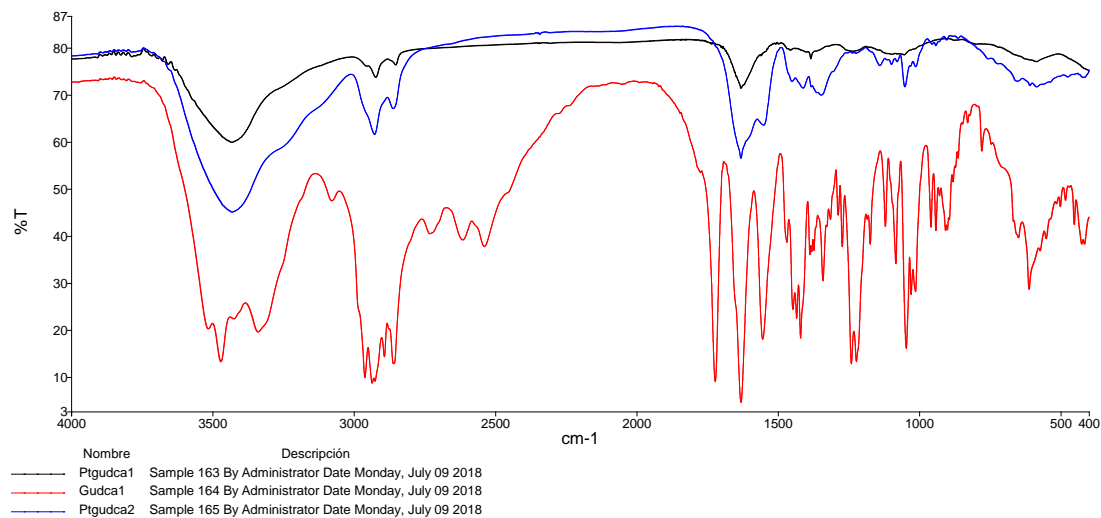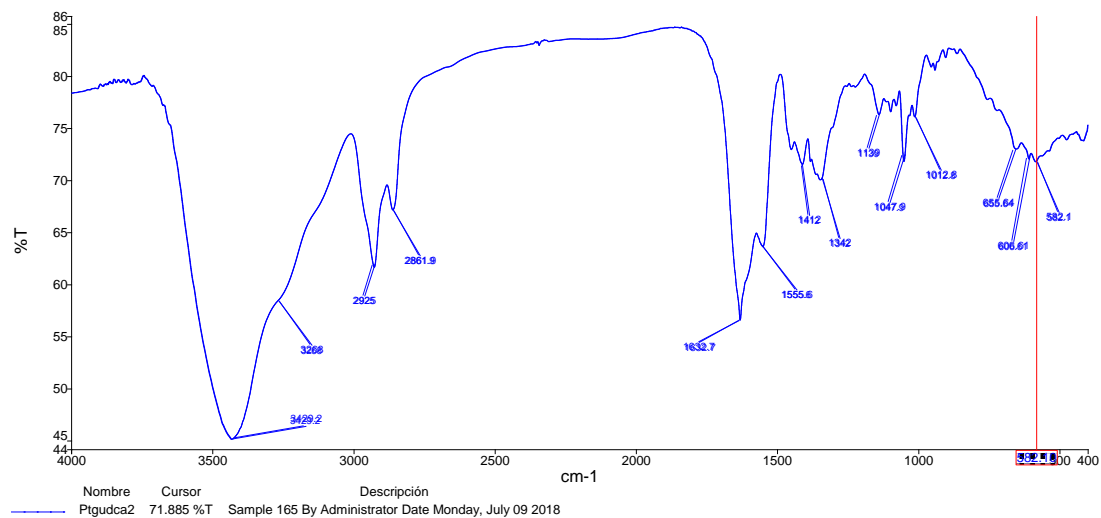

| Peak Number | X (cm-1) | Y (%T) |
|-------------|----------|--------|
| 1           | 3433.85  | 45.17  |
| 2           | 2928.44  | 61.69  |
| 3           | 2862.61  | 67.21  |
| 4           | 1631.99  | 56.62  |
| 5           | 1551.63  | 63.67  |

Figure S4

18rmn-0252 GUDCA  
1H CD3OD

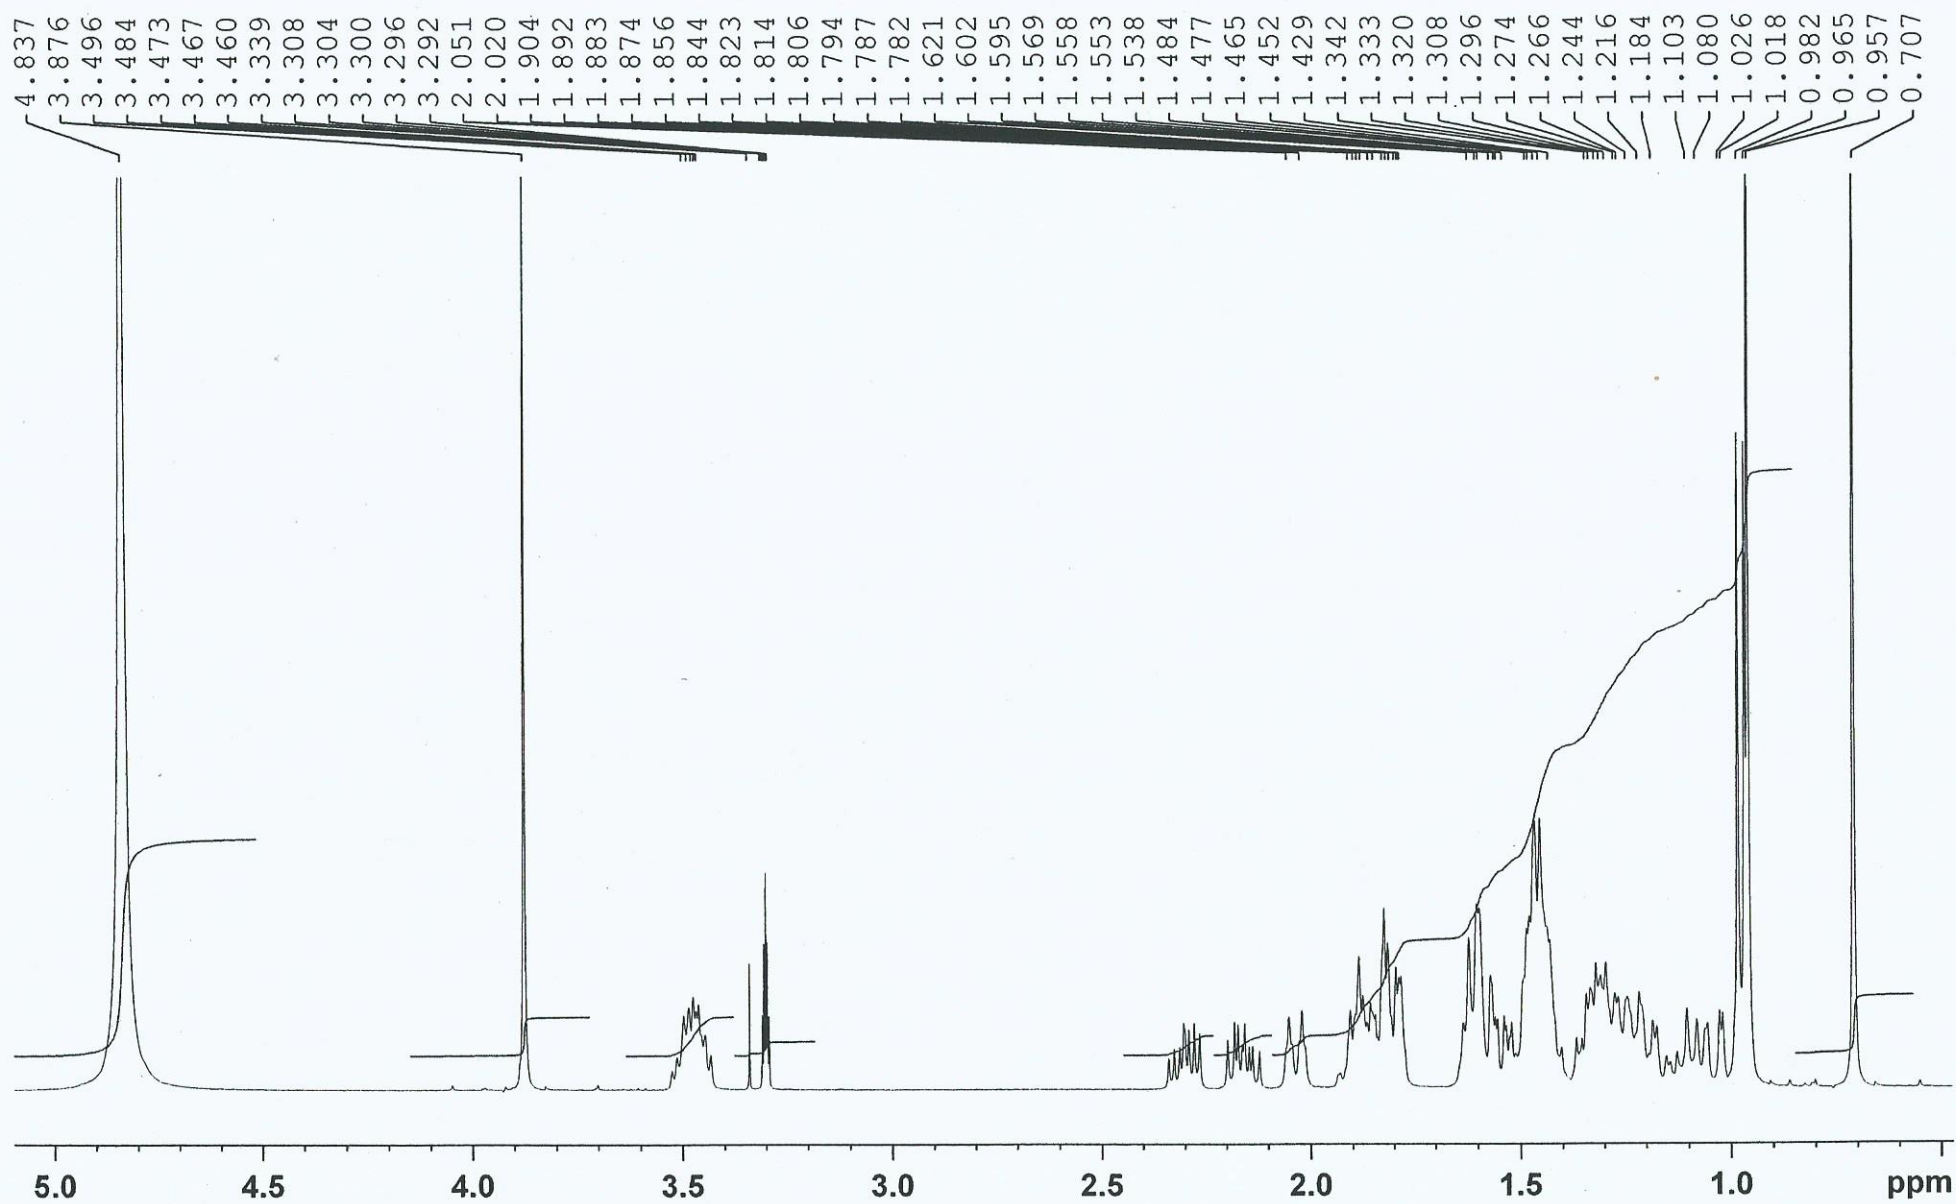

Figure S5

18rmn-0252 GUDCA  
13C CD3OD

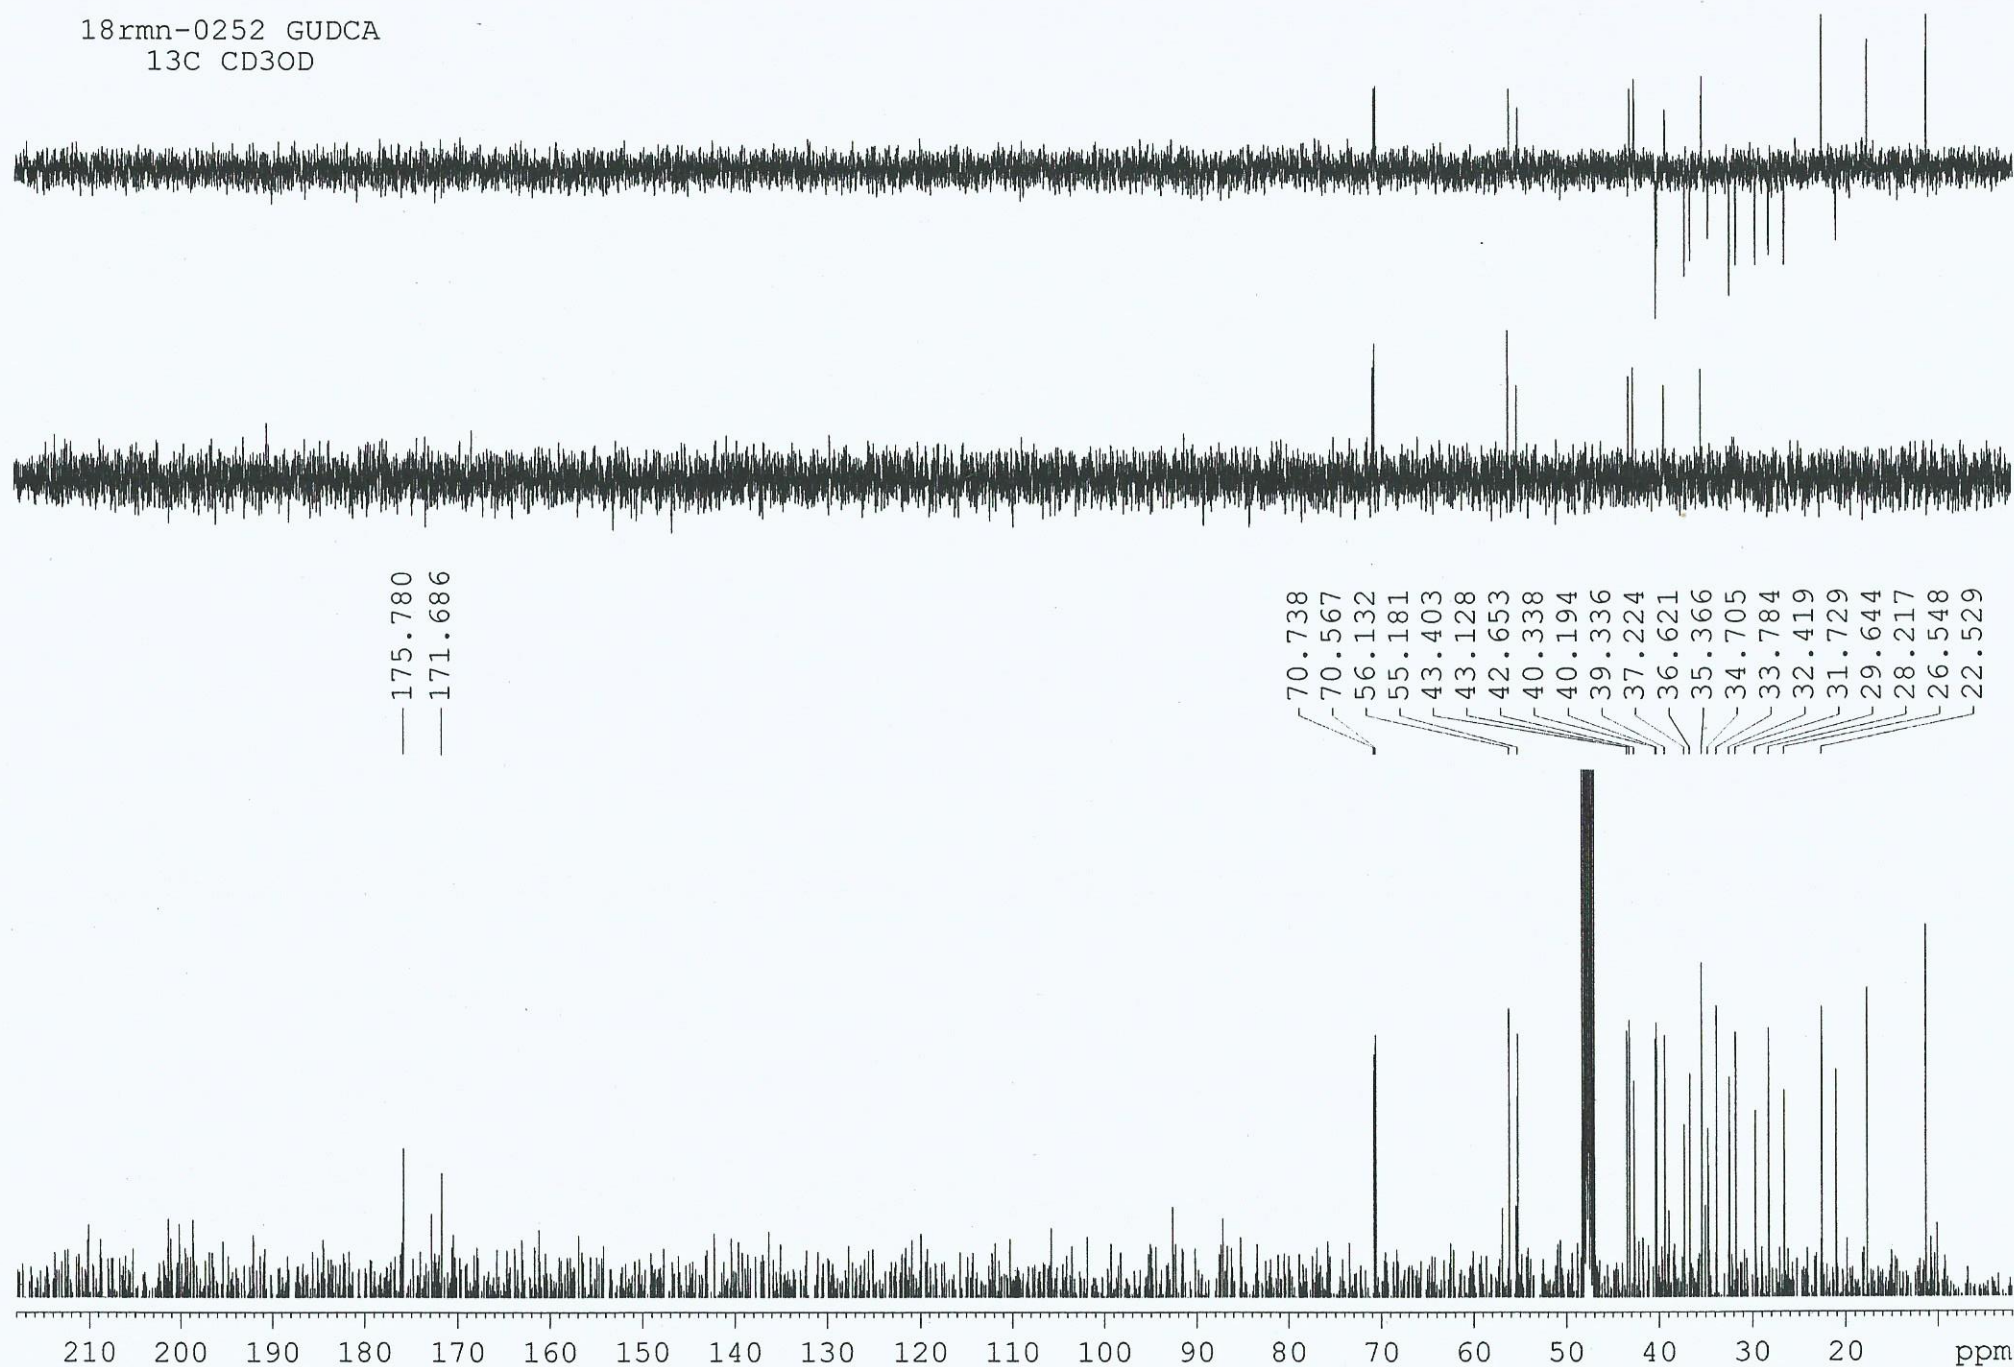

Figure S6

18rmn-0253 GUDCA-Pt  
1H CD3OD

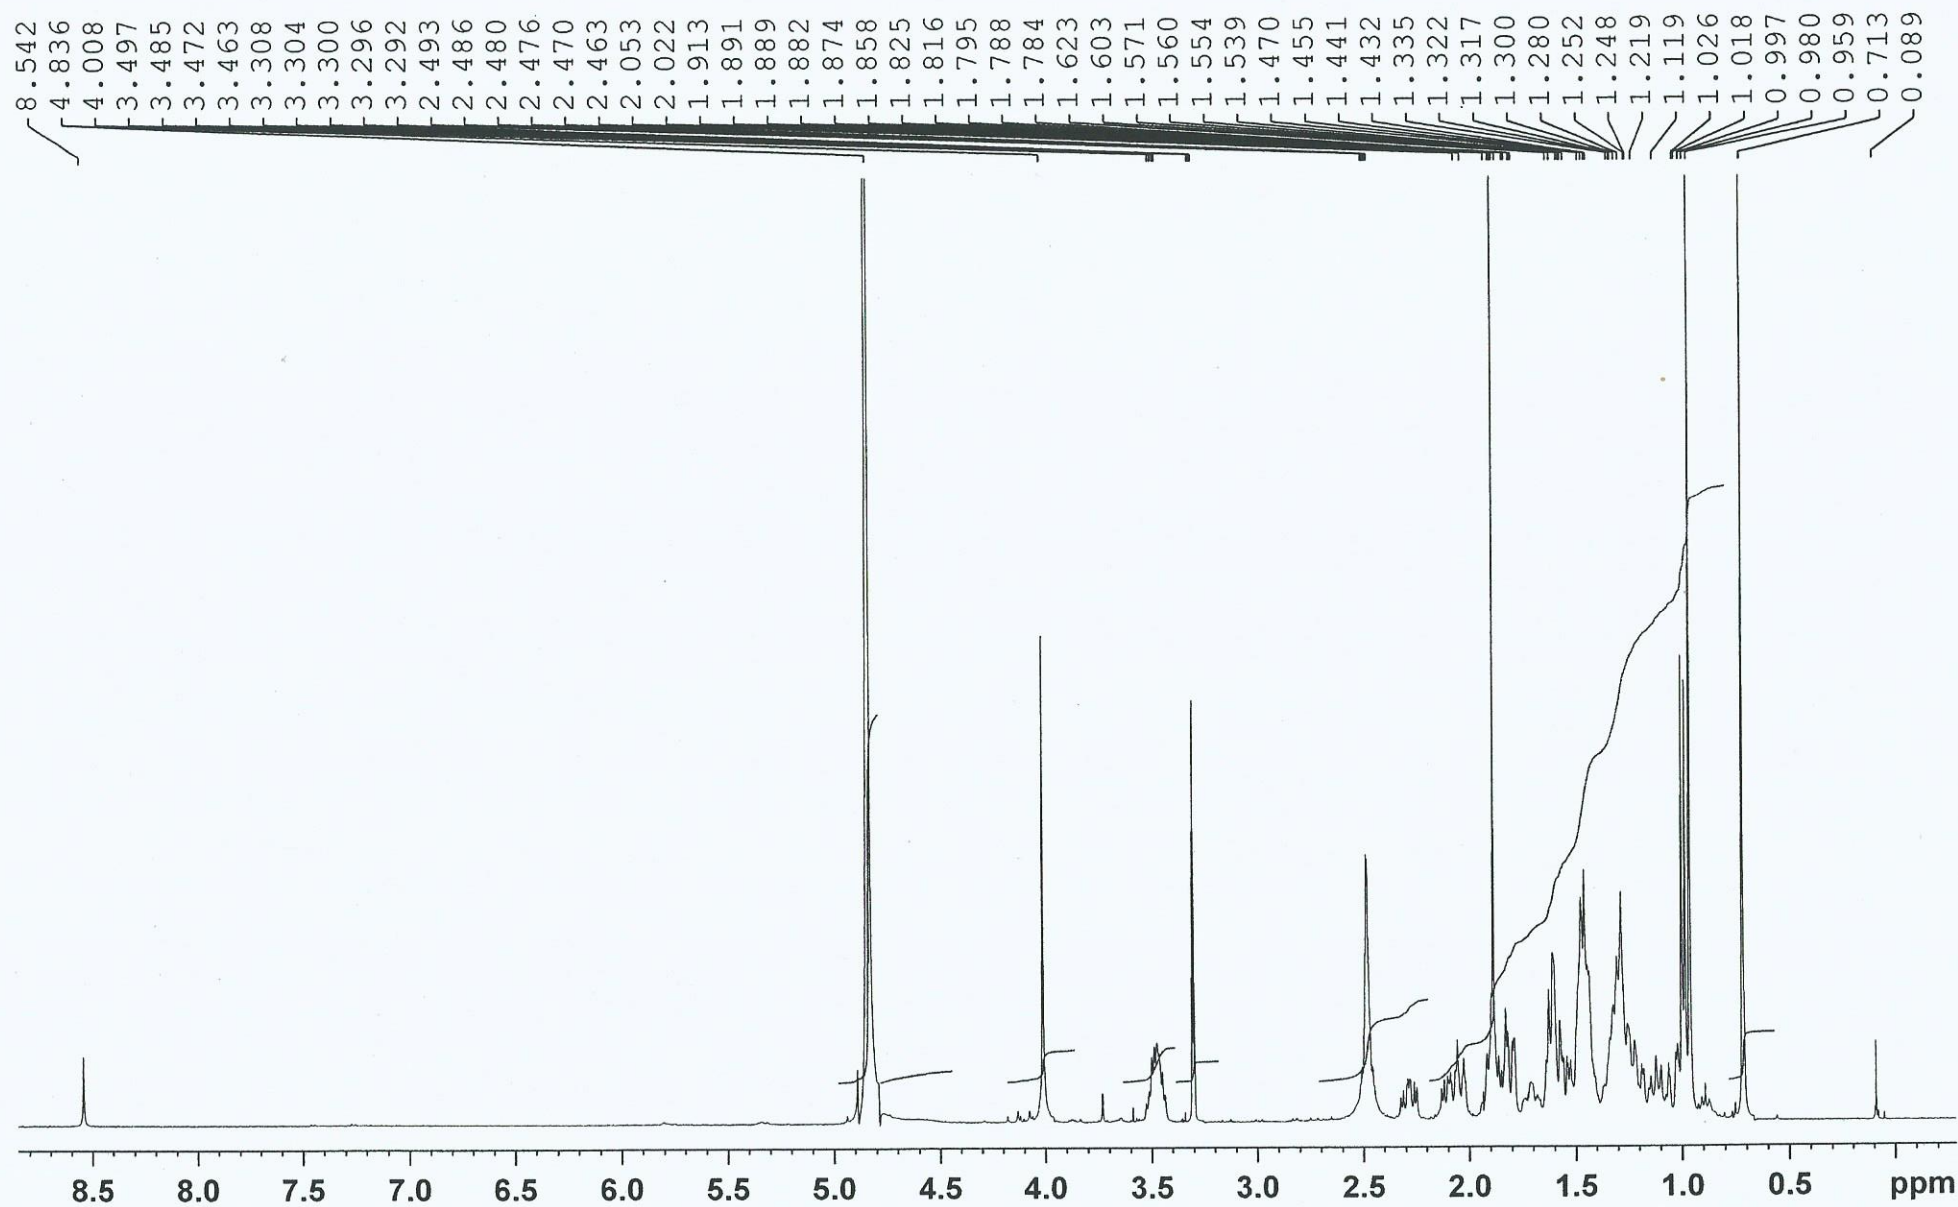



Figure S7

18rmn-0253 Emilio GUDCA-Pt  
13C CD3OD

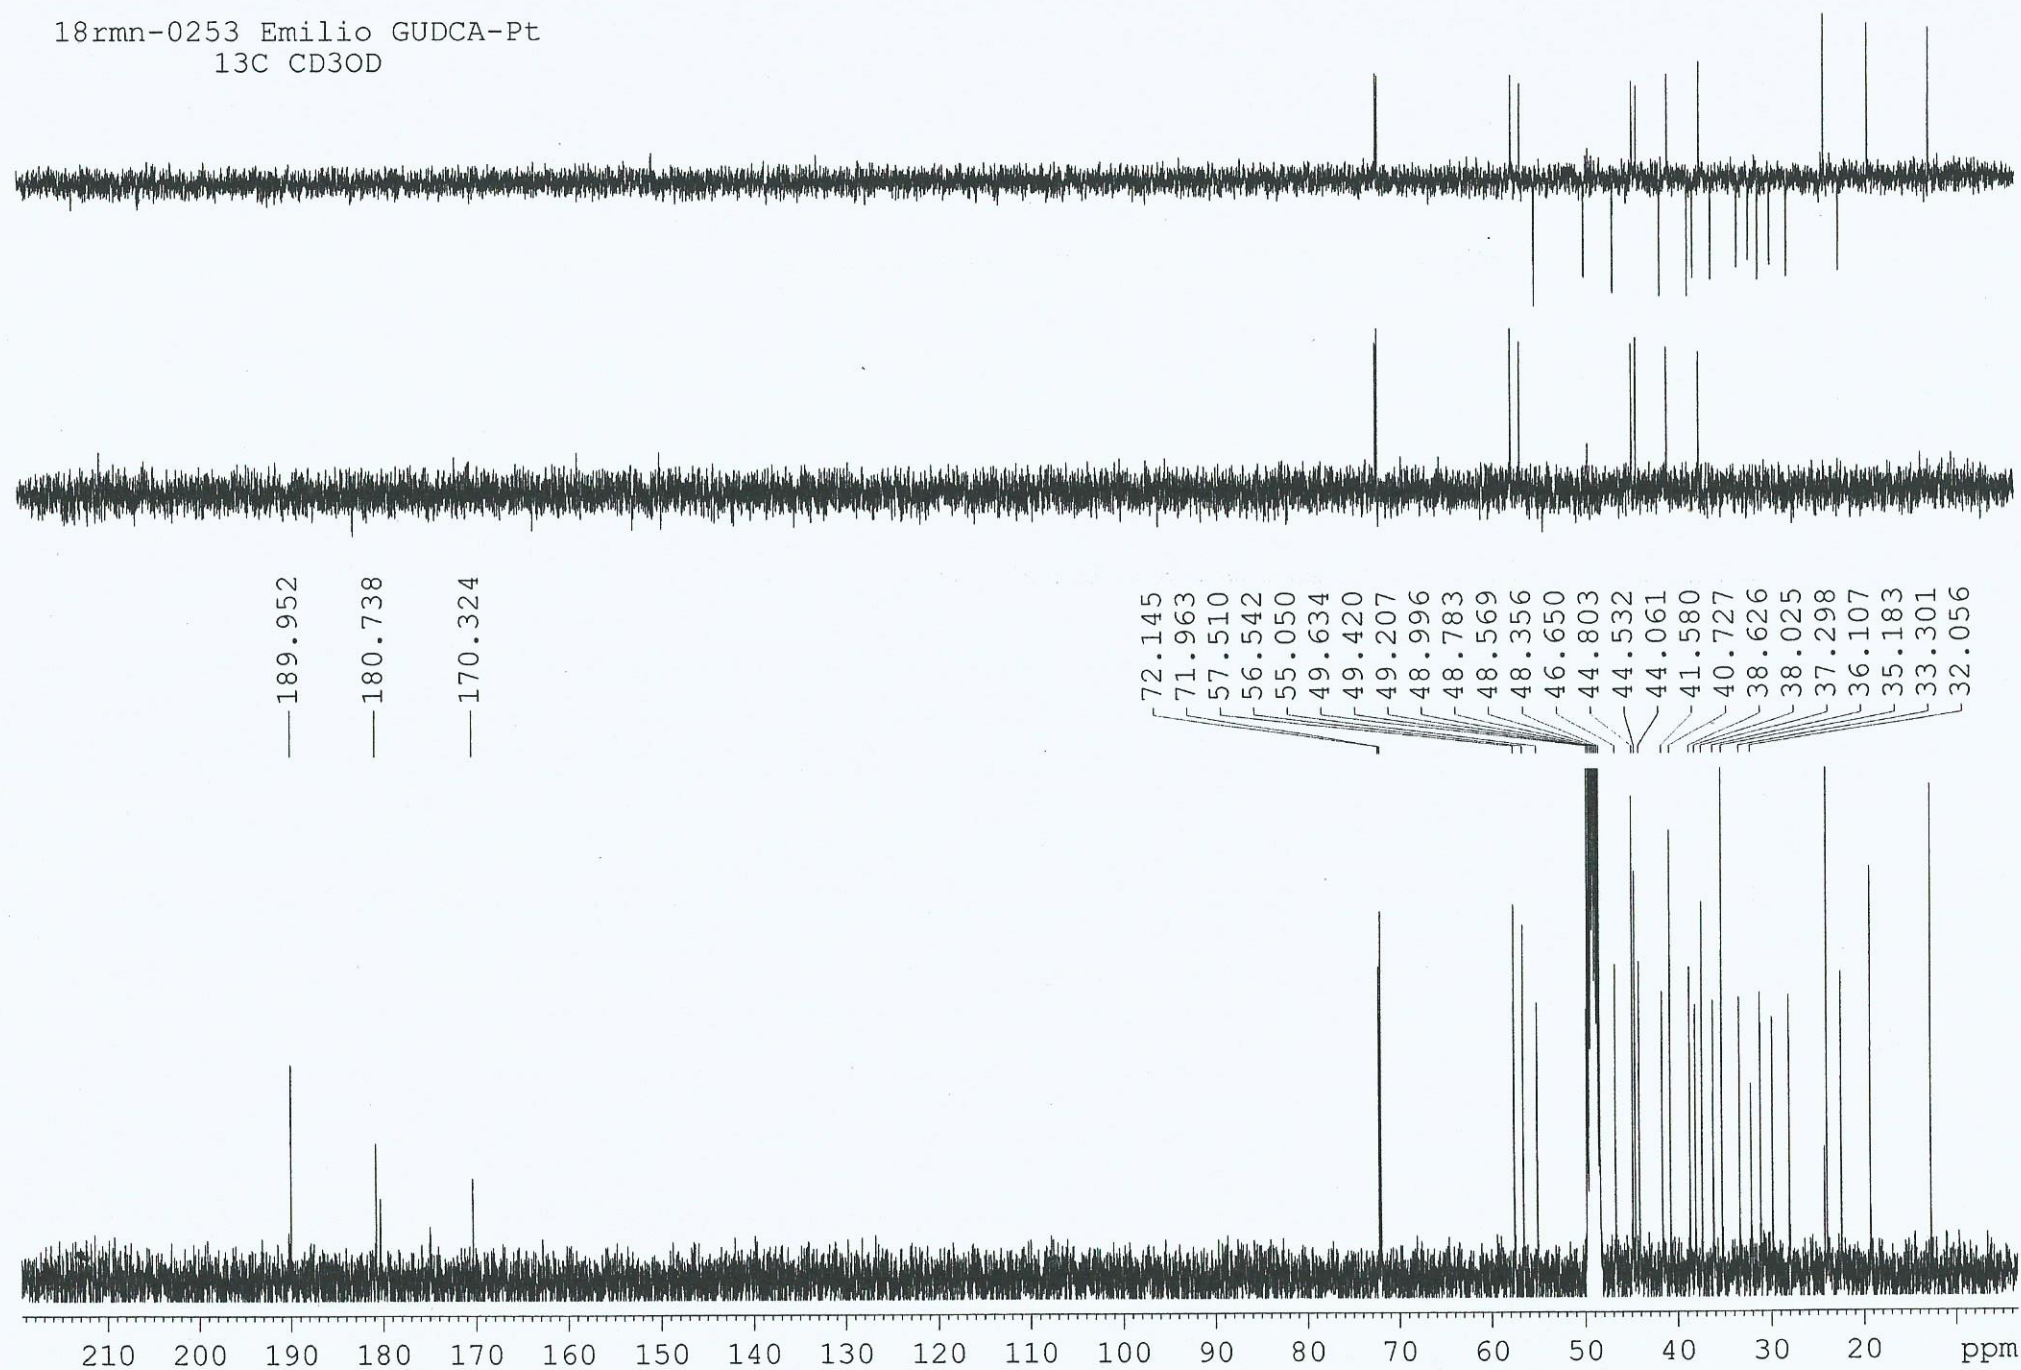



Figure S8

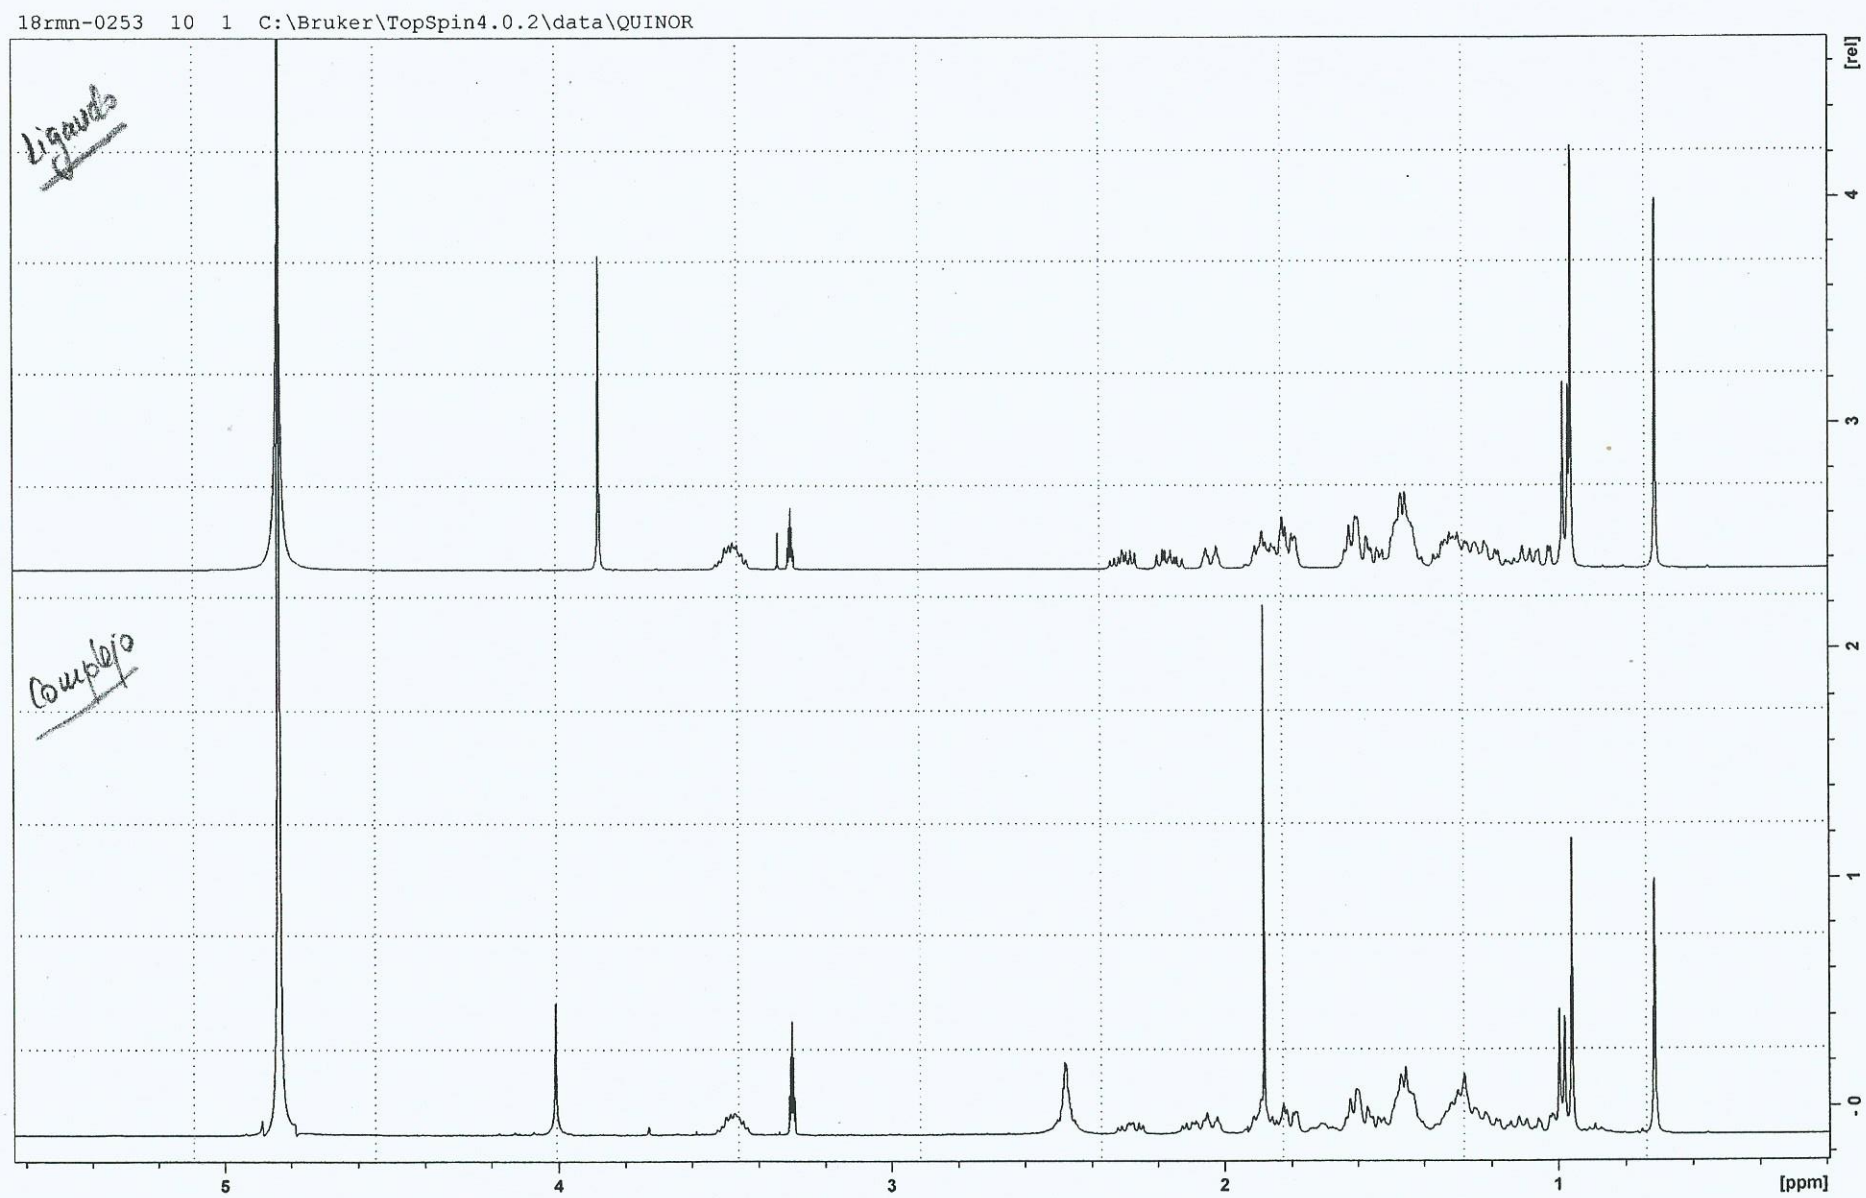

Figure S9

18rmn-0253 Emilio GUDCA-Pt  
195Pt CD3OD

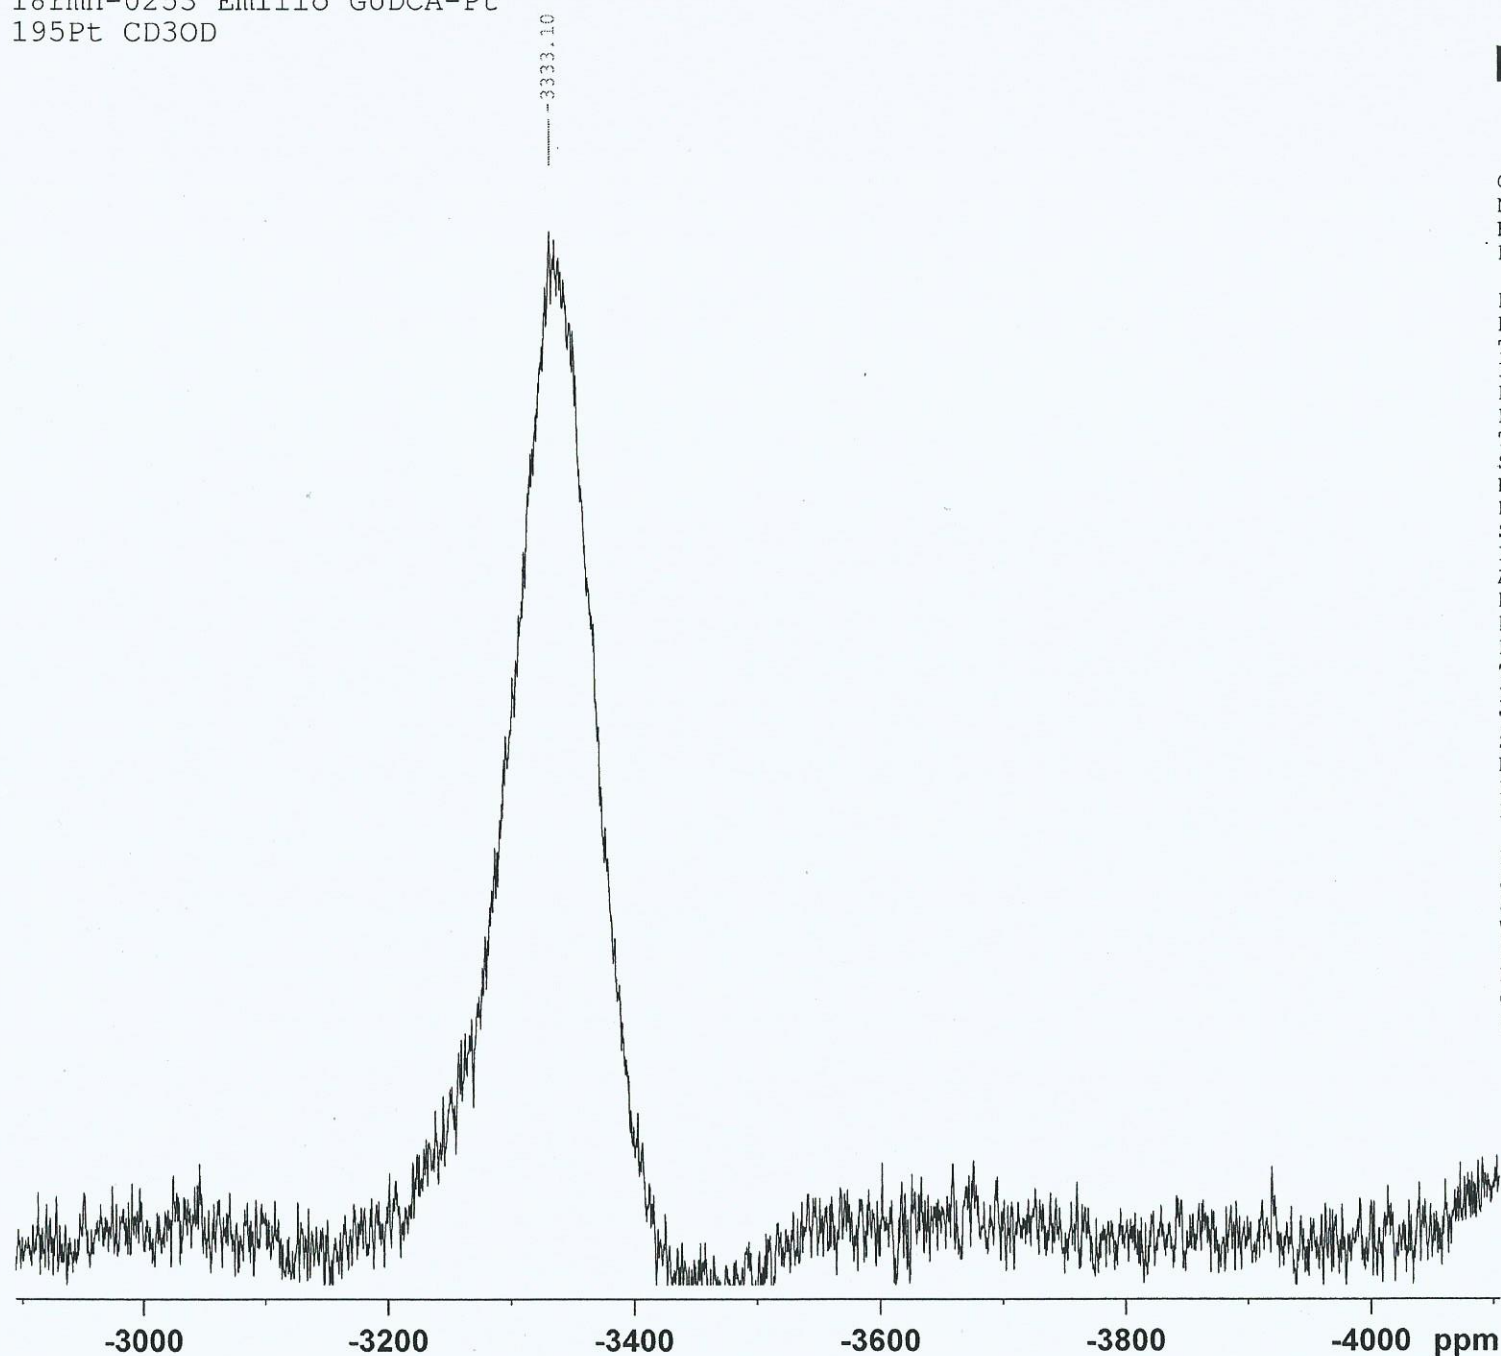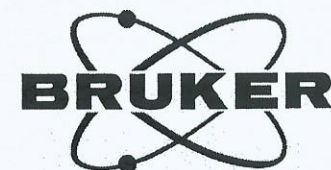

Current Data Parameters  
NAME 18rmn-0253  
EXPNO 14  
PROCNO 1

F2 - Acquisition Parameters  
Date\_ 20180716  
Time 8.26 h  
INSTRUM Avance NEO  
PROBHD z105190\_0012 (zg)  
PULPROG 32768  
TD 63719  
SOLVENT MeOD  
NS 4  
DS 104166.664 Hz  
SWH 6.357829 Hz  
FIDRES 0.1572864 sec  
AQ 8.37054  
RG 4.800 usec  
DW 6.50 usec  
DE 300.0 K  
TE 2.00000000 sec  
D1 1  
TD0 85.7140290 MHz  
SFO1 195Pt  
NUC1 13.00 usec  
P1 47.34999847 W  
PLW1

F2 - Processing parameters  
SI 16384  
SF 86.0150818 MHz  
WDW EM  
SSB 0  
LB 50.00 Hz  
GB 0  
PC 1.40

Figure S10

18rmn-0253 Pt-GUDCA  
195 Pt CD3OD

-2269.37

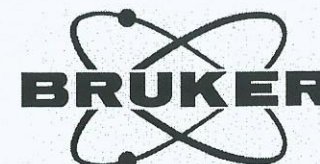

Current Data Parameters  
NAME 18rmn-0253  
EXPNO 15  
PROCNO 1

F2 - Acquisition Parameters  
Date\_ 20180717  
Time\_ 7.05 h  
INSTRUM Avance NEO  
PROBHD Z105190\_0012 (  
PULPROG zg30  
TD 32768  
SOLVENT MeOD  
NS 32768  
DS 4  
SWH 104166.664 Hz  
FIDRES 6.357829 Hz  
AQ 0.1572864 sec  
RG 14.6484  
DW 4.800 usec  
DE 6.50 usec  
TE 300.0 K  
D1 2.00000000 sec  
TD0 1  
SFO1 85.8430517 MHz  
NUC1 195Pt  
P1 13.00 usec  
PLW1 47.34999847 W

F2 - Processing parameters  
SI 16384  
SF 86.0150818 MHz  
WDW EM  
SSB 0  
LB 50.00 Hz  
GB 0  
PC 1.40

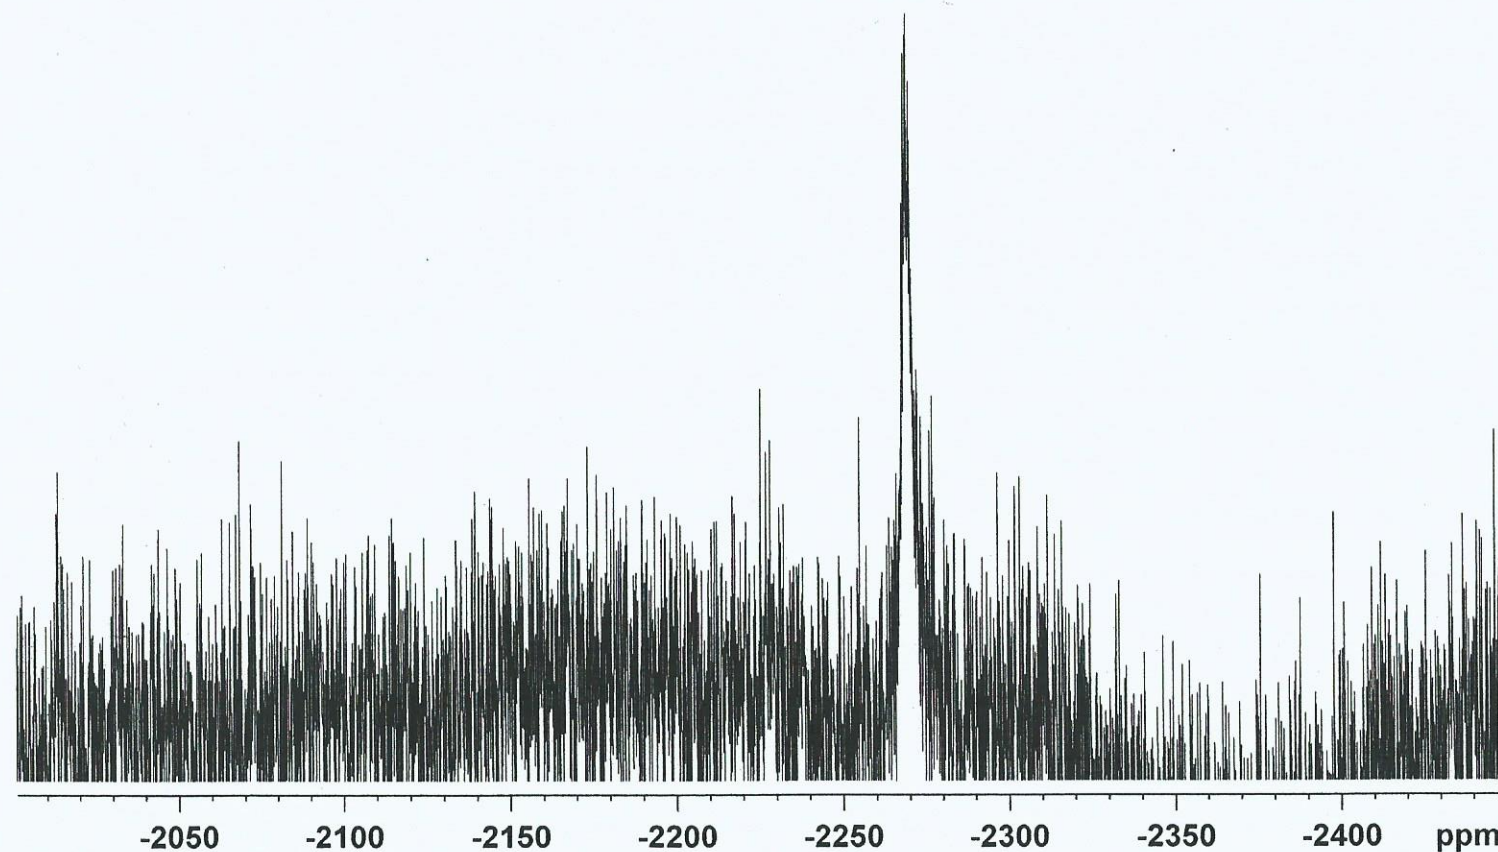



Figure S11

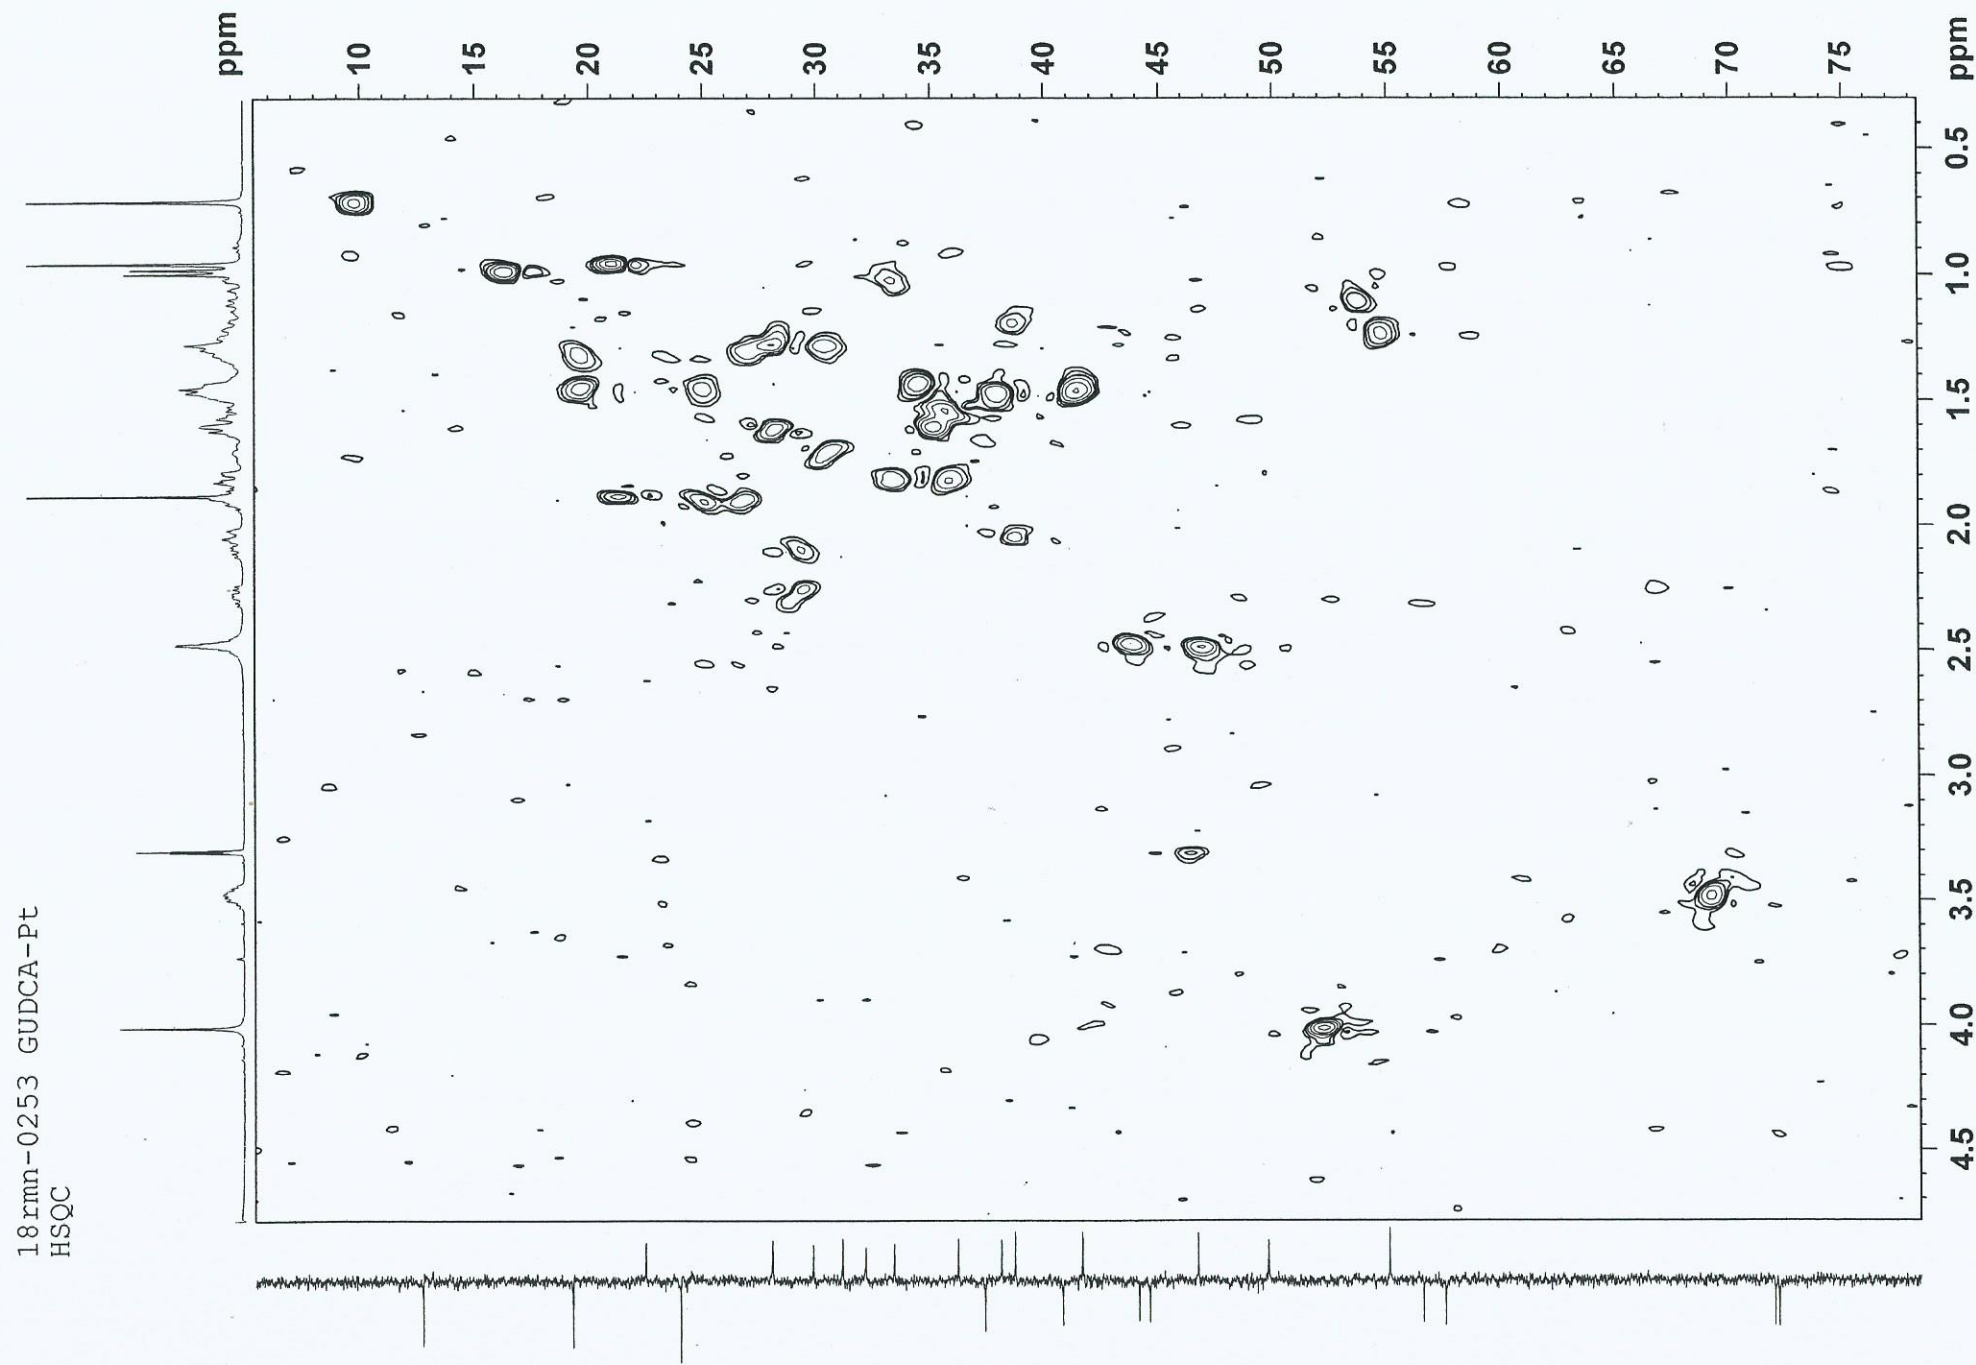

Figure S12

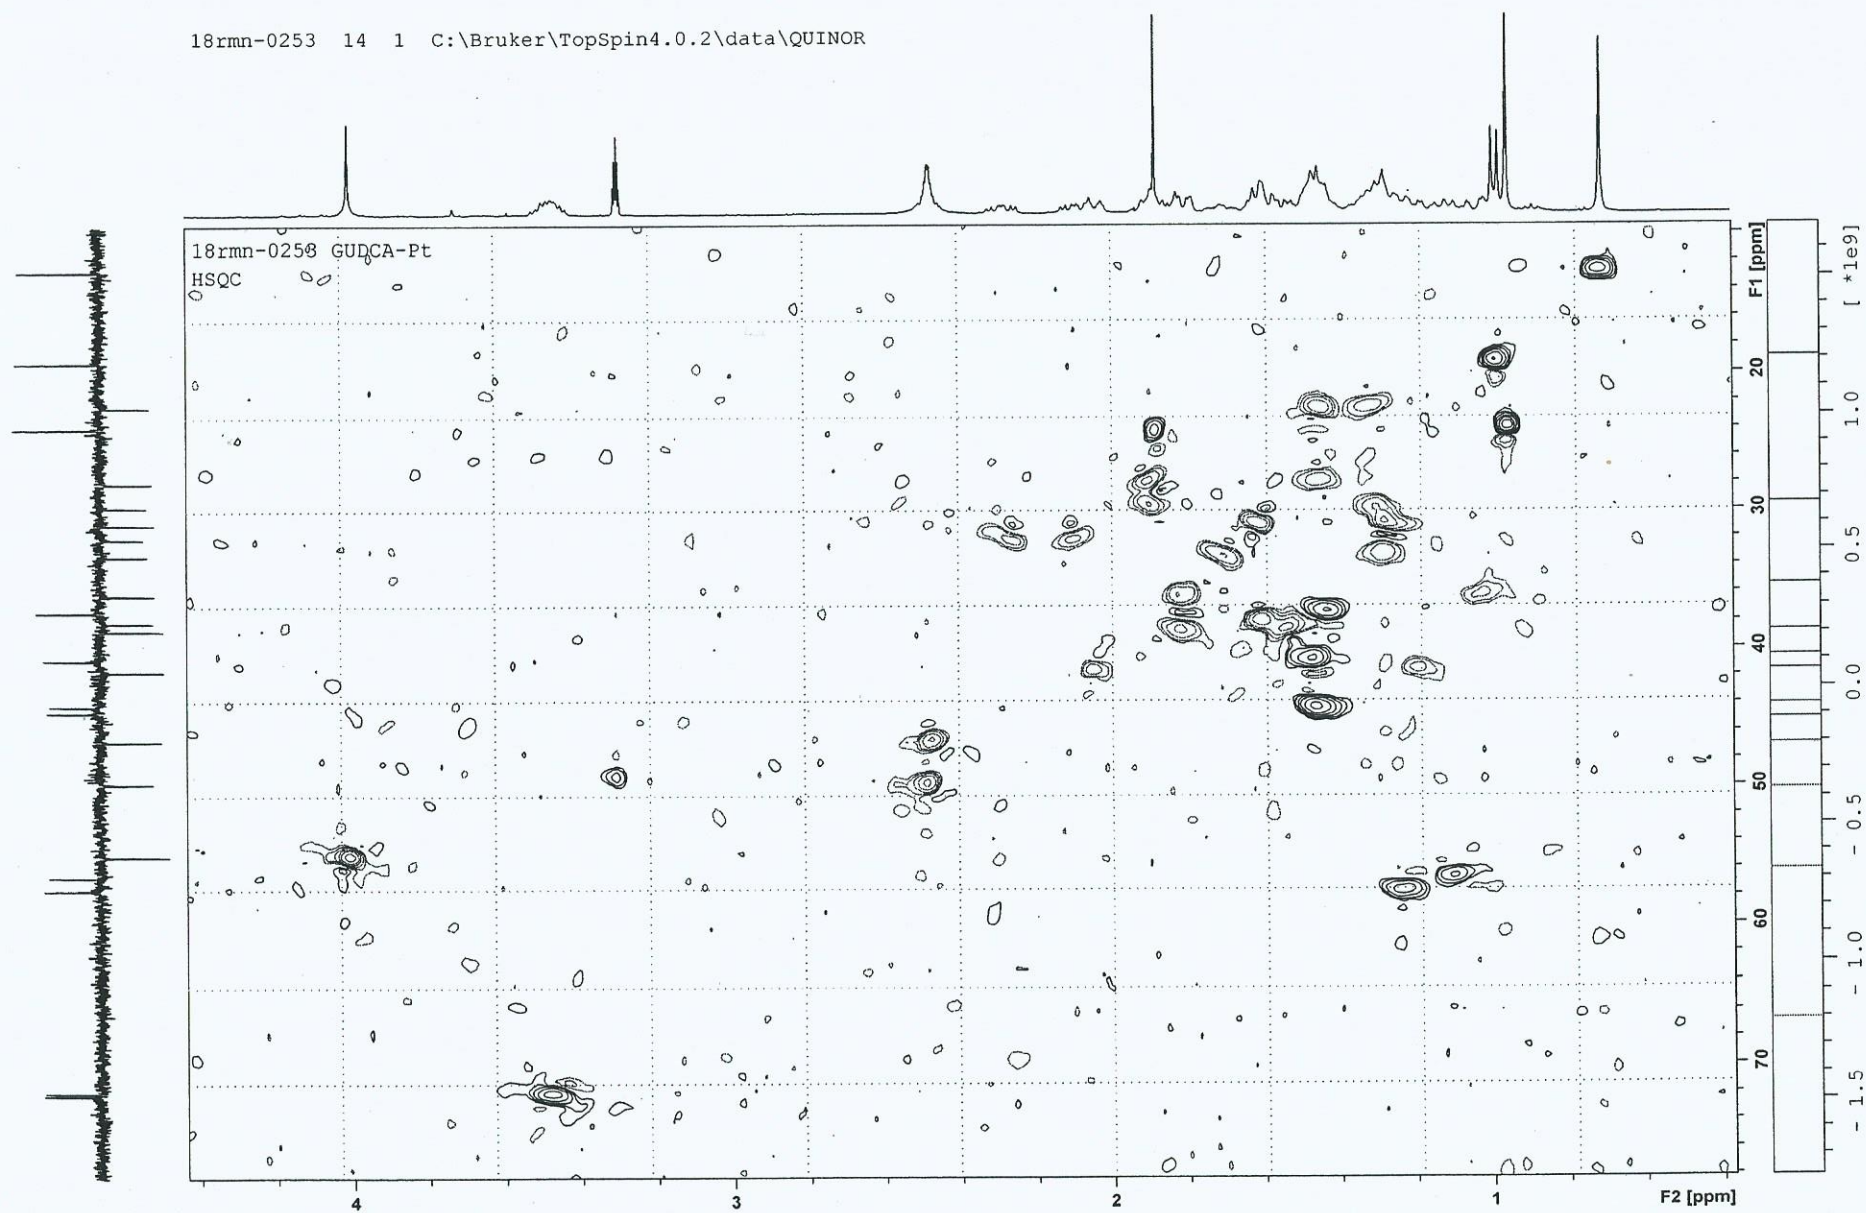



Figure S13

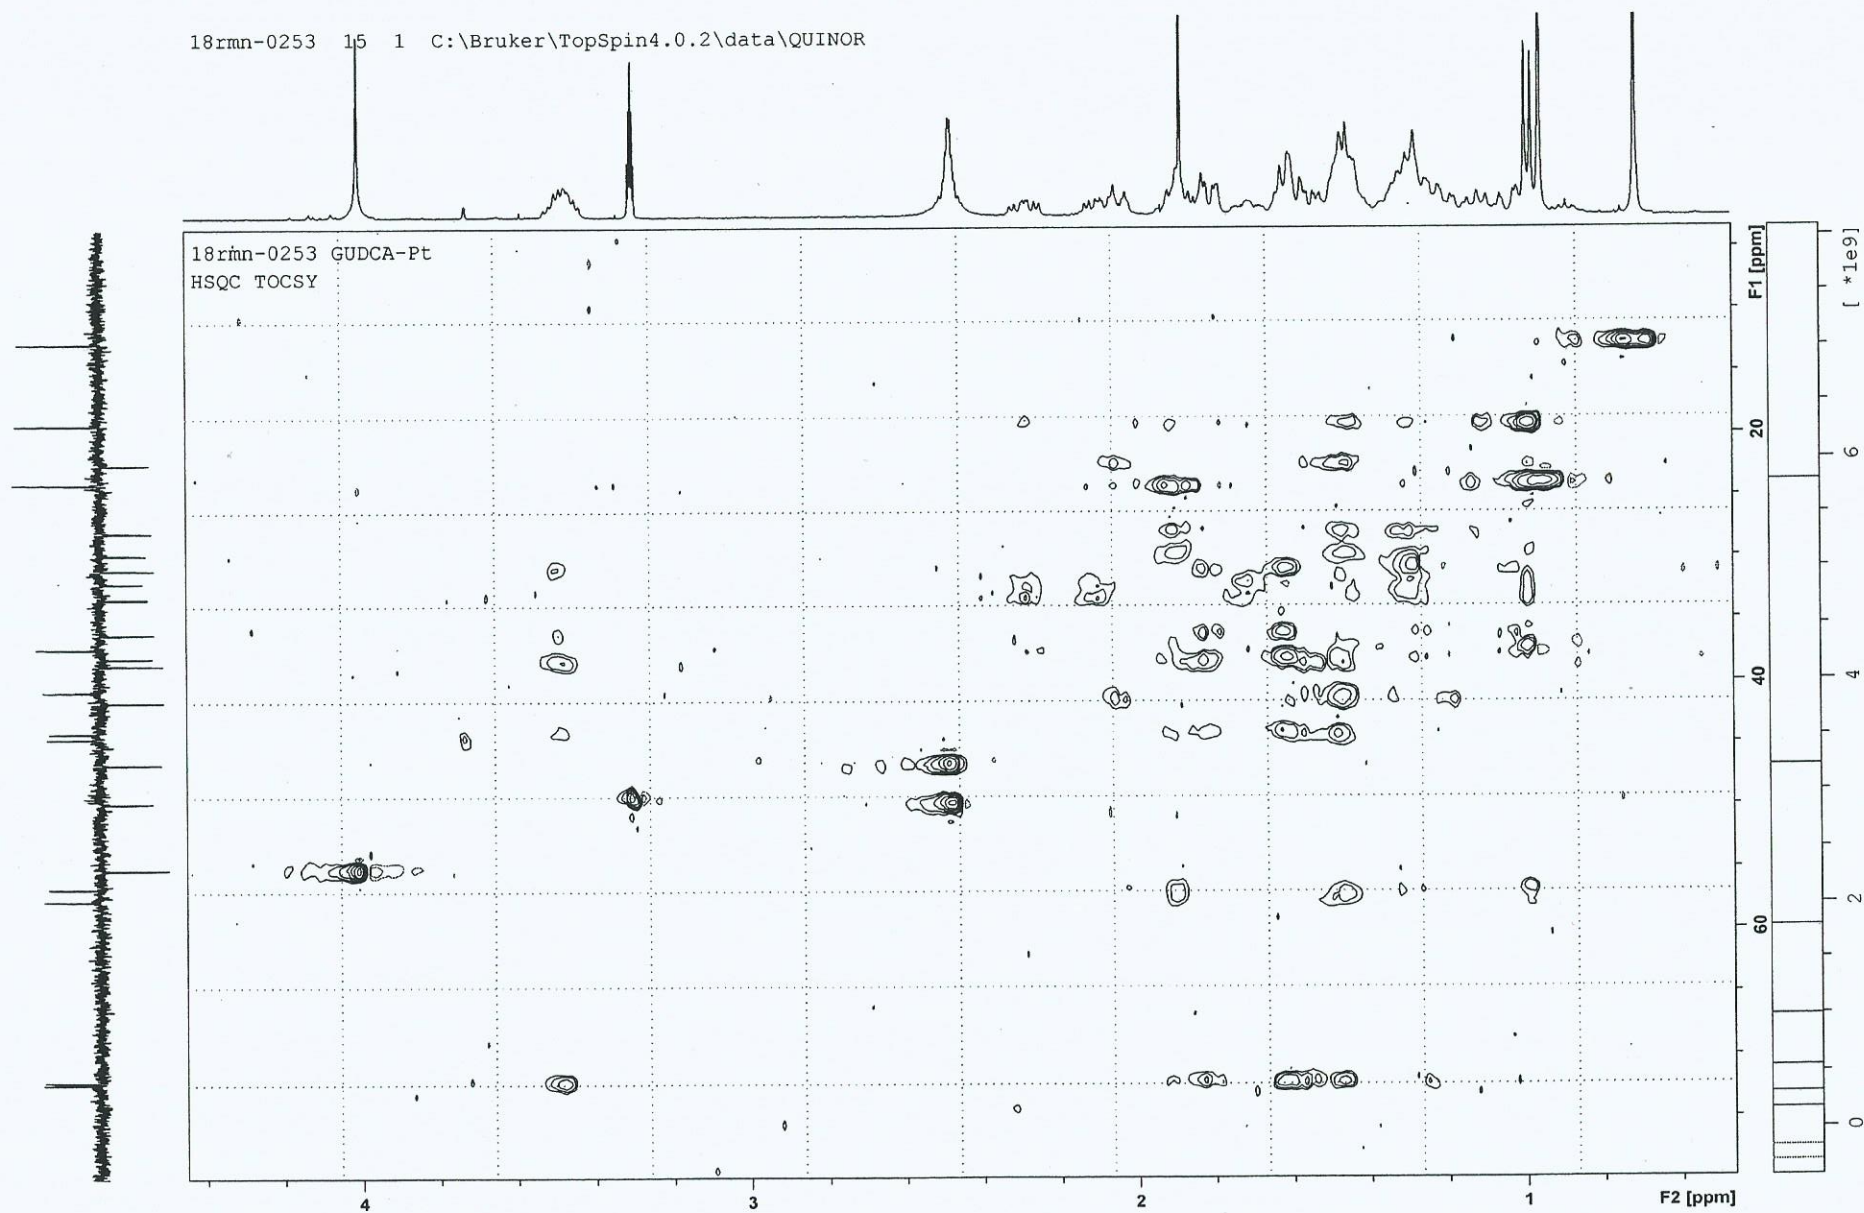

Figure S14

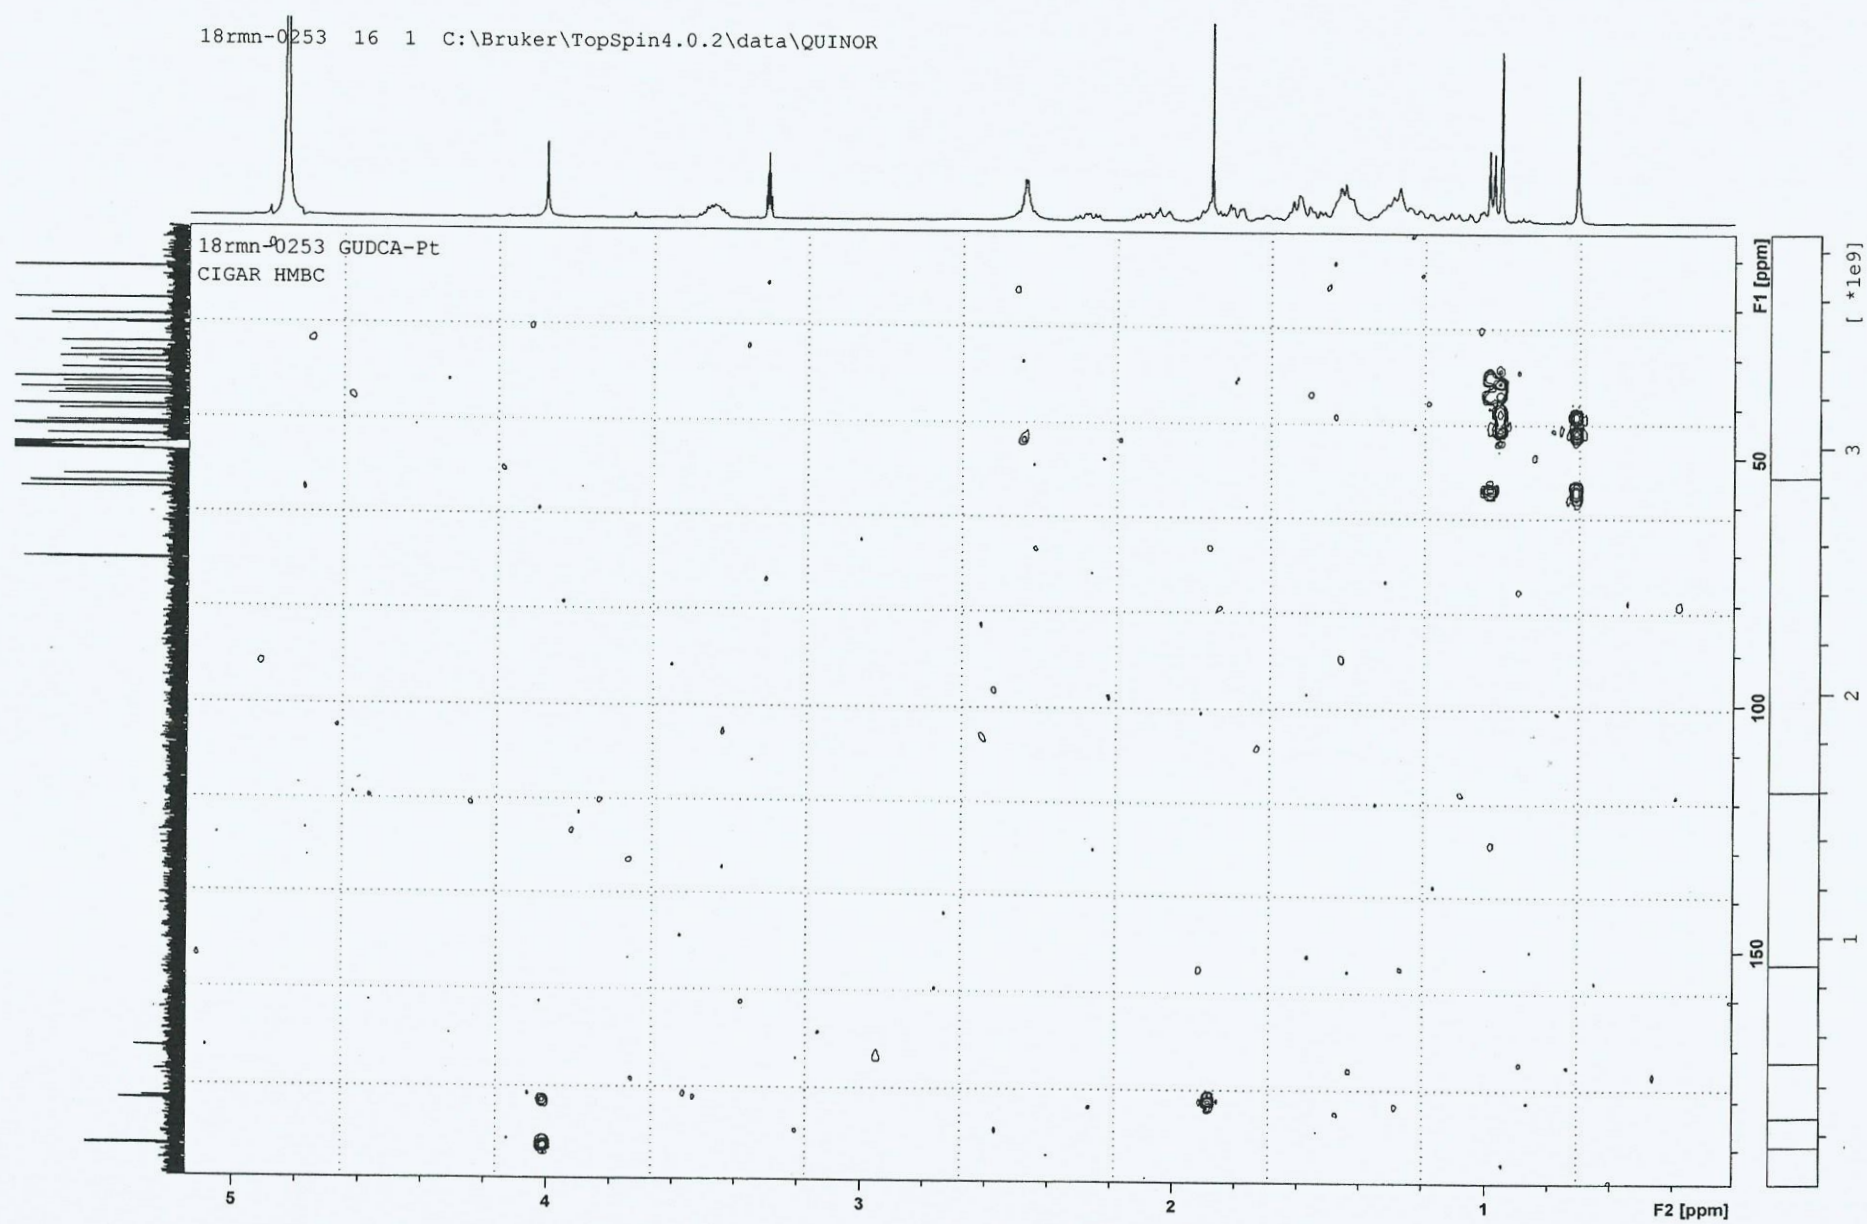

18rmn-0253 GUDCA-Pt  
CIGAR HNBC

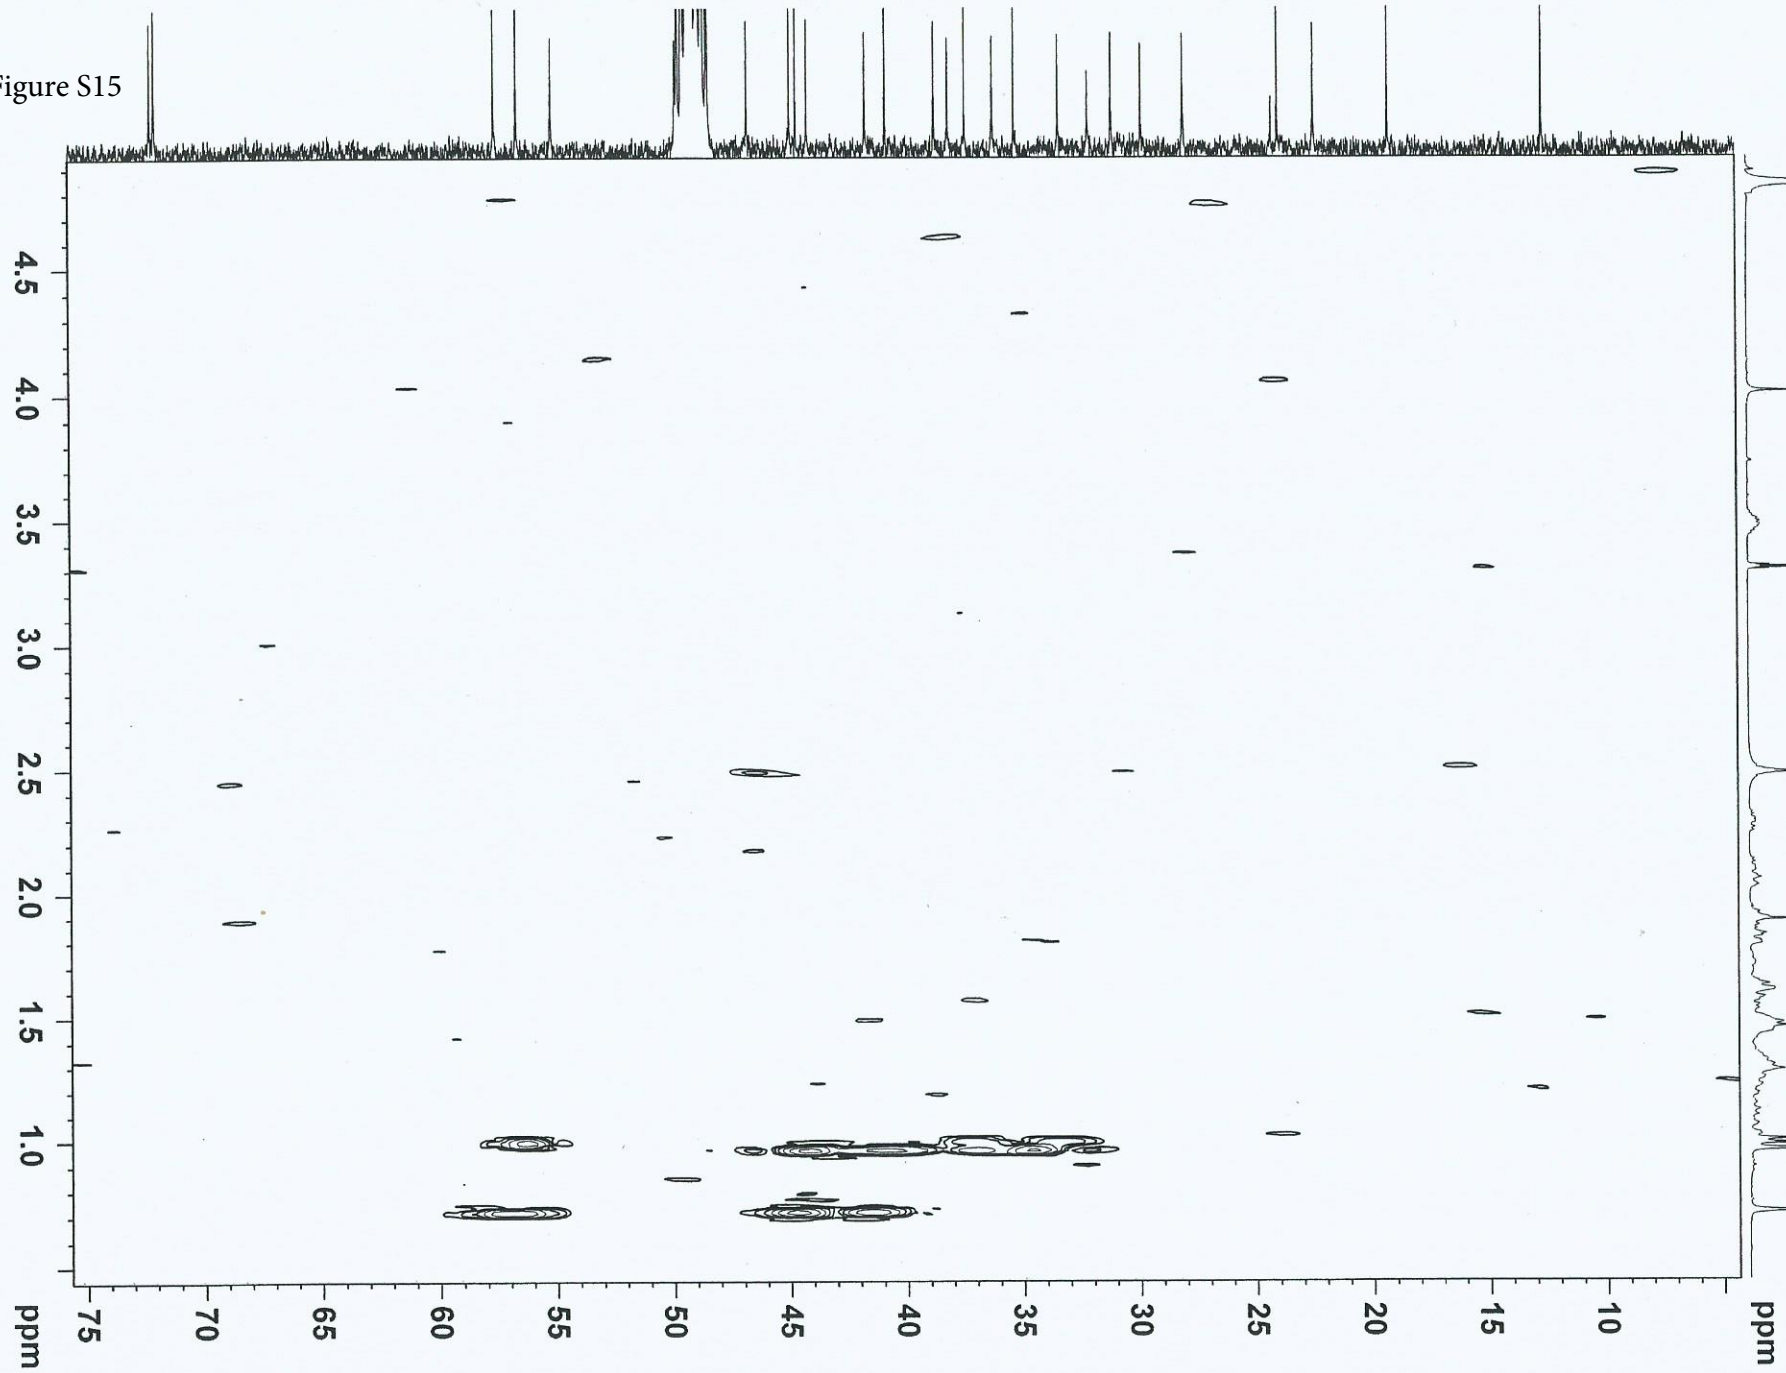

Figure S15

Figure S16

S. G. Espectrometría de Masas - USAL.

Solicitante:

Emilio Rodriguez

Masa nominal

Emitido por: César Raposo (Responsable SGEM)

GU-Pt3

emilio257 49 (0.409) Cn (Cen,2, 80.00, Ht); Sm (Mn, 2x0.50); Sb (1,40.00 ); Cm (47:72-10:29)

3.73e6

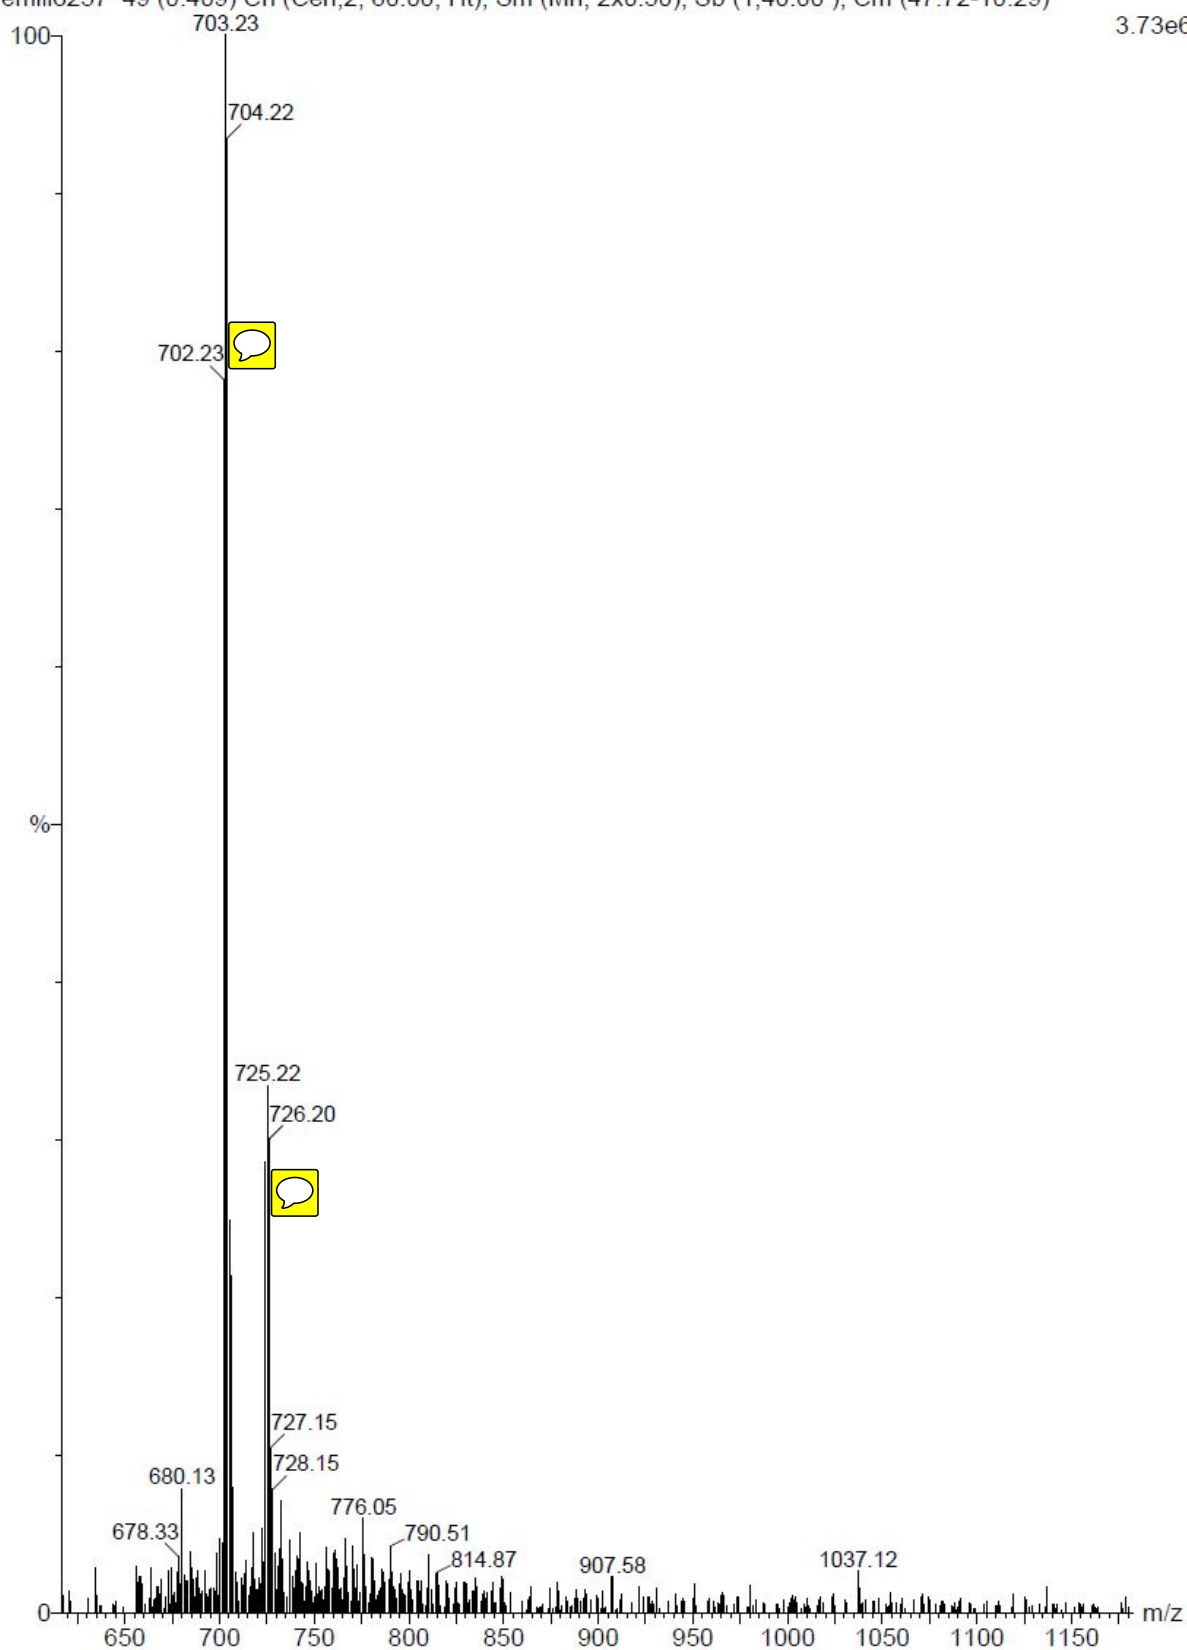

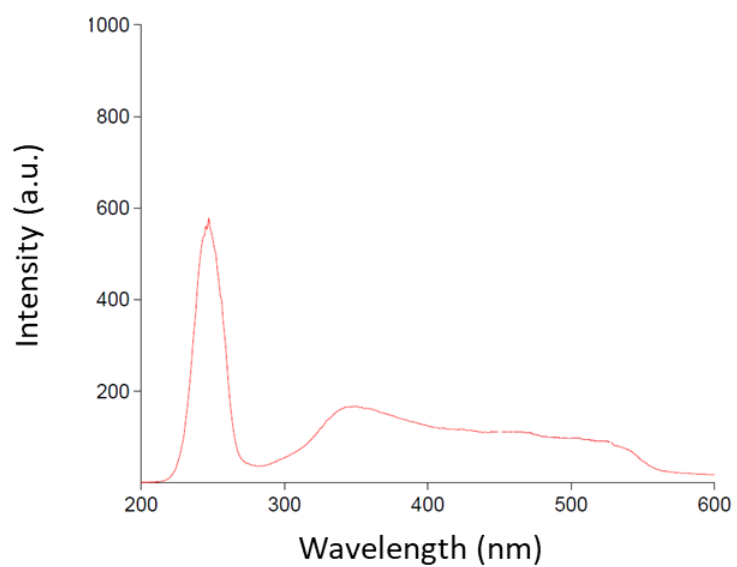

Figure S17: Fluorescence spectrum in water of  $[\text{PtCl}(\text{GUDCA})\text{en}]$  ( $4.33 \times 10^{-4} \text{ M}$ ),  $\lambda_{\text{exc.}} = 240 \text{ nm}$ . Quantum yield,  $Q = 0.10$  (by comparison with quinine sulfate).

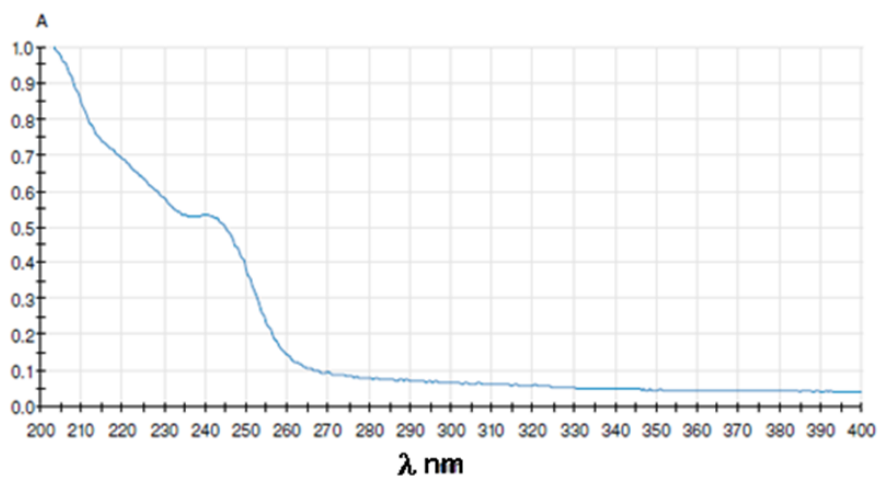

Figure S18: UV spectrum in water of  $[\text{PtCl}(\text{GUDCA})\text{en}]$  ( $6.37 \times 10^{-6} \text{ M}$ )



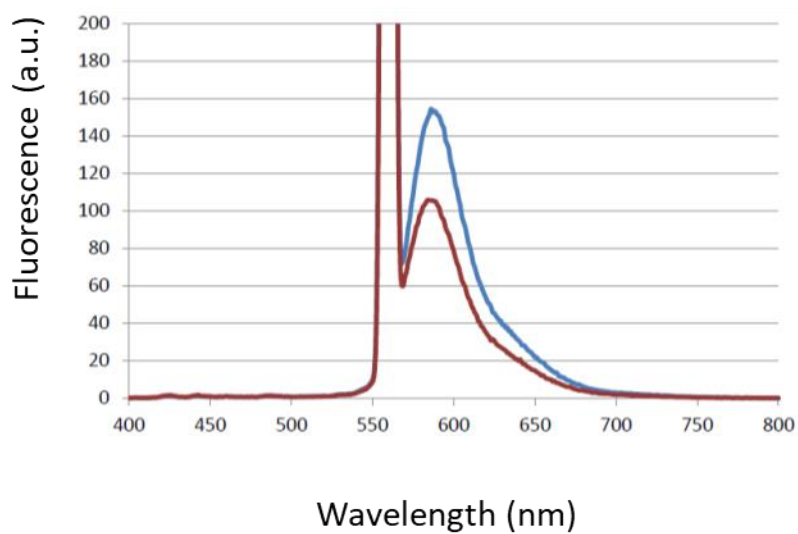

Figure S19: Fluorescence of IONP@BCP ( $C(\text{Fe}_2\text{O}_3) = 0.097 \text{ mg/mL}$ , brown) and IONP@BCP@[PtCl(GUDCA)en] ( $C(\text{Pt}) = 4.95 \times 10^{-4} \text{ M}$ , blue).  $\lambda_{\text{exc.}} = 554 \text{ nm}$ ,  $\lambda_{\text{em.}} = 586 \text{ nm}$ .

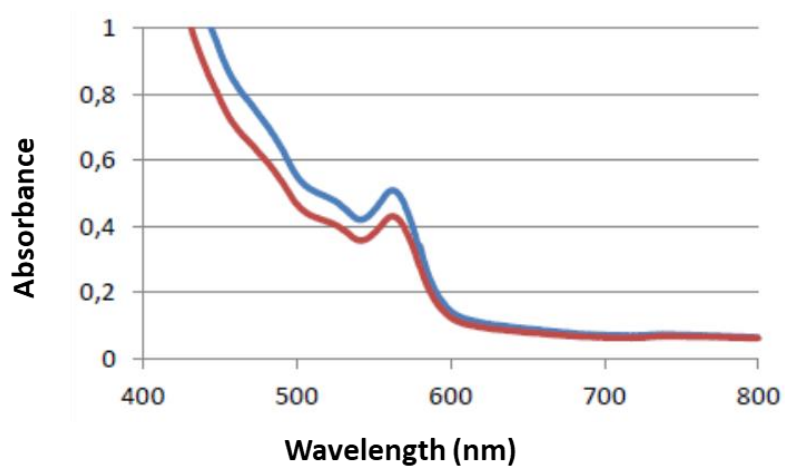

Figure S20: UV-vis spectra of IONP@BCP ( $C(\text{Fe}_2\text{O}_3) = 0.097 \text{ mg/mL}$ , brown) and IONP@BCP@[PtCl(GUDCA)en] ( $C(\text{Pt}) = 4.95 \times 10^{-4} \text{ M}$ , blue).

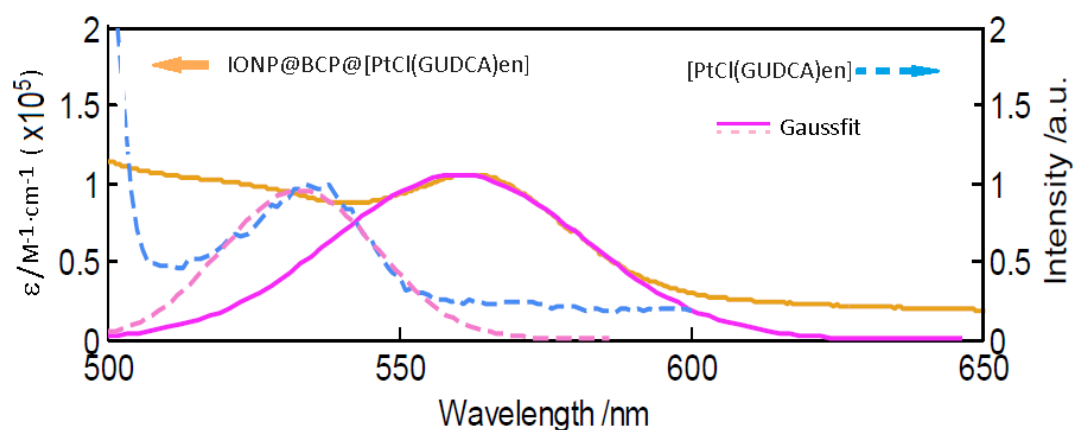

Figure S21: Normalized emission spectrum of  $[\text{PtCl}(\text{GUDCA})\text{en}]$  and absorption spectrum of  $\text{IONP@BCP@[PtCl}(\text{GUDCA})\text{en}]$ . The overlap integral ( $J$ ) expresses the degree of spectral overlap between the donor emission and the acceptor absorption. In this case:  $J = 4.296 \times 10^{15} \text{ nm}^4 / (\text{M} \cdot \text{cm})$ .

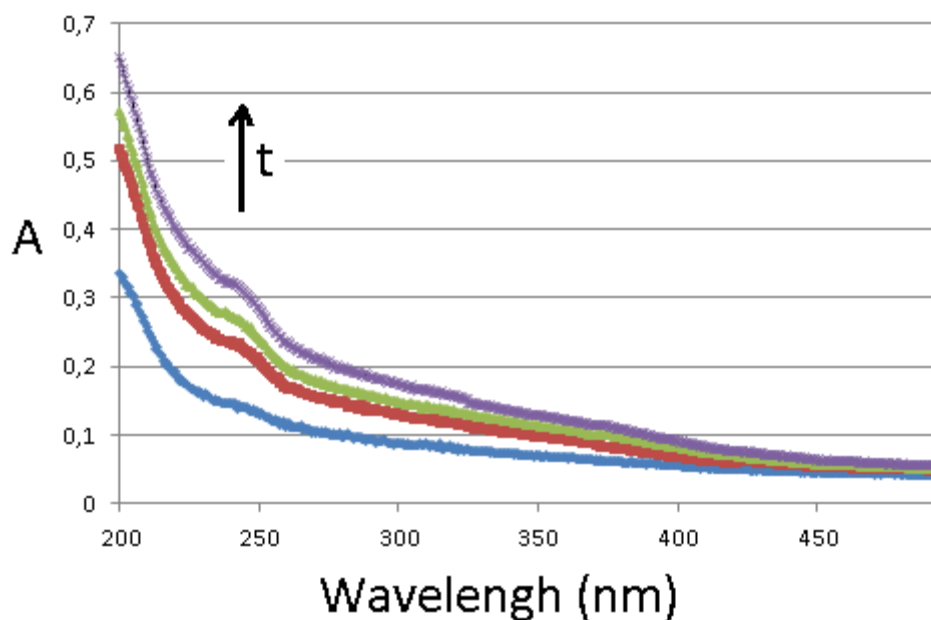

Figure S22: UV spectrum of Pt release versus time showing the characteristic shoulder of  $[\text{PtCl}(\text{GUDCA})\text{en}]$  at 240 nm.

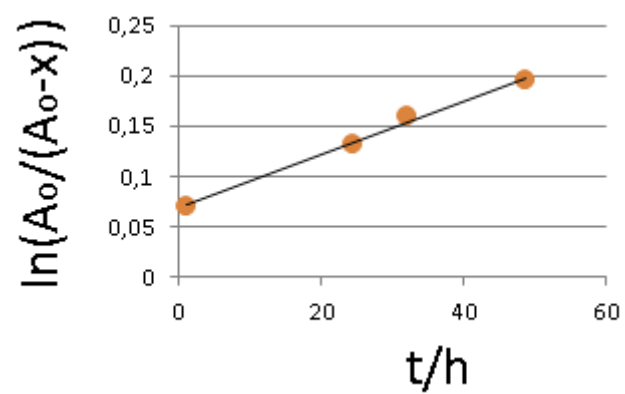

Figure S23: Representation of the data according to first-order kinetics,  $\ln(A_0/(A_0-x)) = kt$ .  $A_0$  is the absorbance of the complex bound to the nanoparticles at  $t = 0$ ;  $x$  is the absorbance of the complex released at time  $t$  in hours.

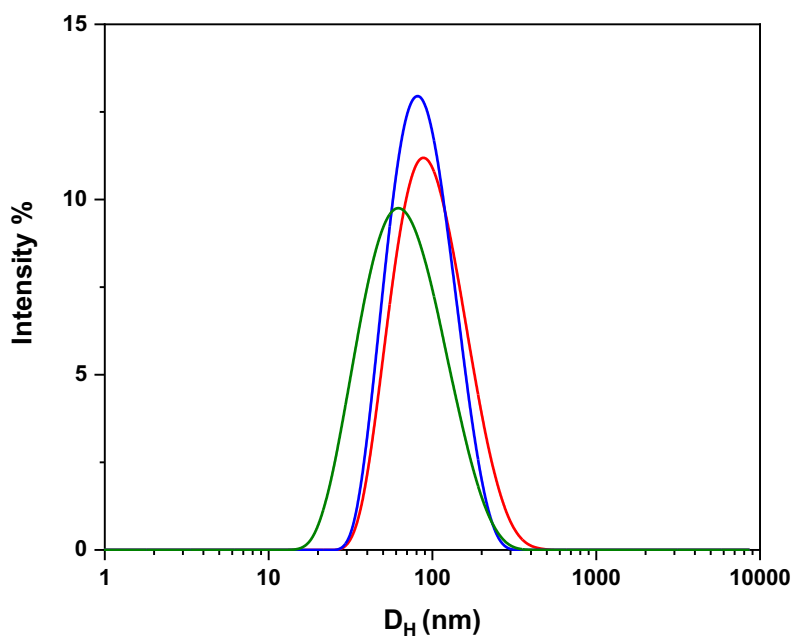

**Figure S24.** Intensity distribution of hydrodynamic diameters of NPs before coating (green), after coating (blue), and after functionalization with [Pt (GUDCA)<sub>2</sub>en complexes (red).

**Table S1.** Intensity mean hydrodynamic diameter (DH) and standard deviation (SD) of the nanoparticle suspensions obtained from dynamic light scattering (DLS) measurements.

| Sample                     | DH (nm) | SD (nm) |
|----------------------------|---------|---------|
| IONP                       | 75.9    | 43.0    |
| IONP@BCP                   | 89.9    | 38.1    |
| IONP@BCP@<br>[Pt(GUDCA)en] | 107.5   | 54.1    |

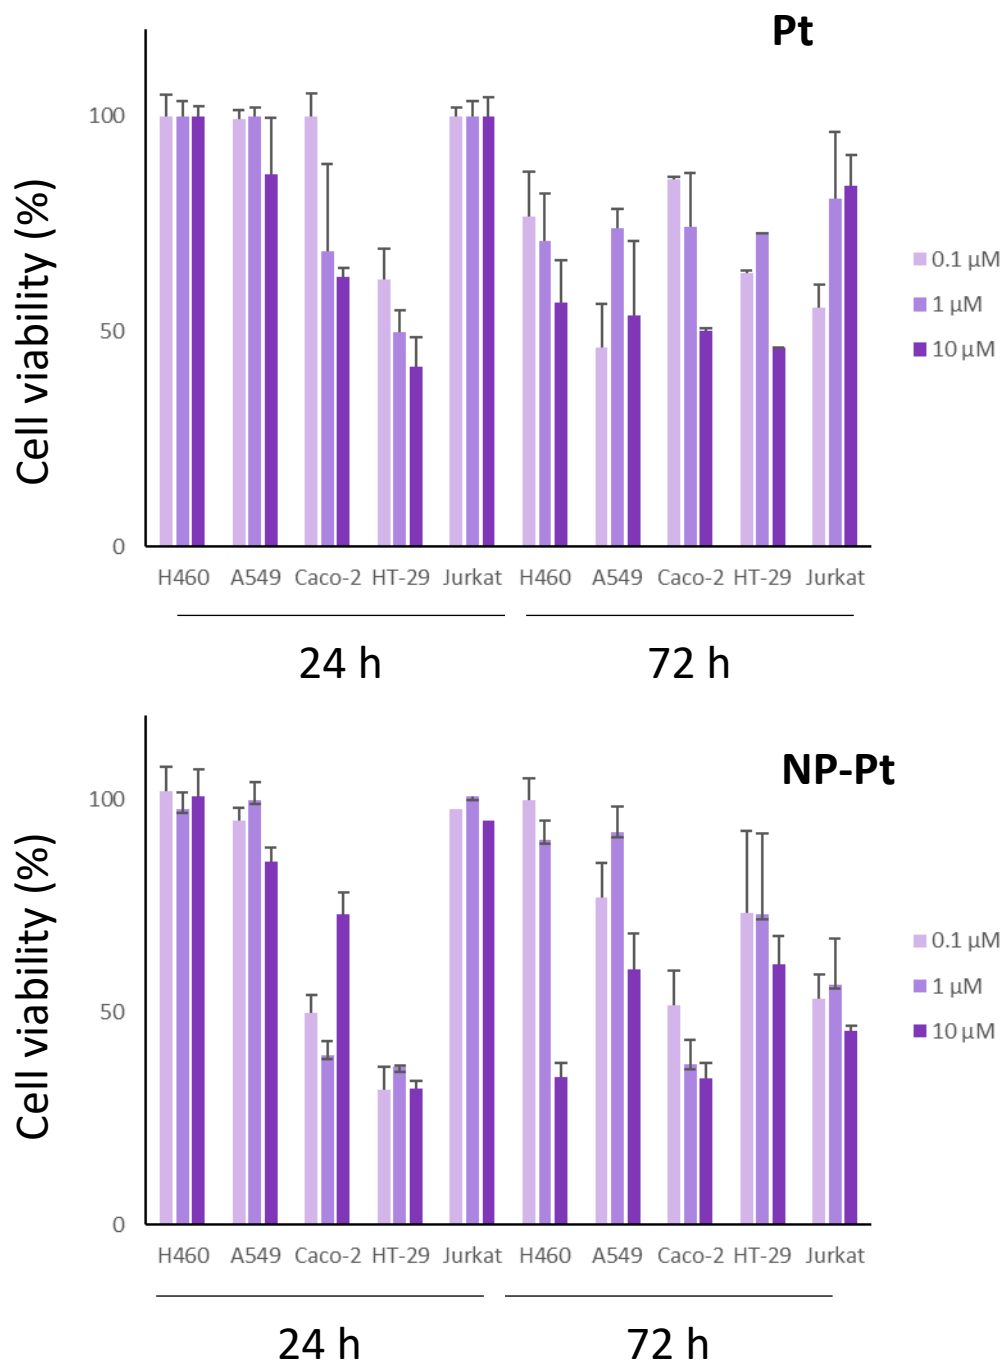

**Figure S25:** viability results of Pt compound and NP-Pt at 24 and 72 h of incubation in different concentrations (0.1, 1 and 10  $\mu\text{M}$ ).
